# Supplementary material for: Cycloaddition reactions of polyenic donor–π-acceptor systems with an electron-rich alkyne: access to new chromophores with second-order optical nonlinearities
Source: Royal Society of Chemistry journal article supplement (doi:10.1039/c2ob26515j), 2012-01-01
Supplement: c2ob26515j.pdf [file c2ob26515j.pdf]

ORGANIC & BIOMOLECULAR CHEMISTRY

ELECTRONIC SUPPLEMENTARY INFORMATION FOR

**Cycloaddition reactions of polyenic Donor- $\pi$ -Acceptor systems with an electron-rich alkyne: access to new chromophores with second-order optical nonlinearities**

Elena Galán,<sup>a</sup> Raquel Andreu,<sup>a,\*</sup> Javier Garín,<sup>a</sup> Jesús Orduna,<sup>a</sup> Belén Villacampa,<sup>b</sup> and Beatriz E. Diosdado<sup>c</sup>

<sup>a</sup>Departamento de Química Orgánica, ICMA, Universidad de Zaragoza-CSIC, 50009 Zaragoza, Spain.

<sup>b</sup>Departamento de Física de la Materia Condensada, ICMA, Universidad de Zaragoza-CSIC, 50009 Zaragoza, Spain.

<sup>c</sup>Servicio de Difracción de Rayos X y Análisis por Fluorescencia, ICMA, Universidad de Zaragoza-CSIC. 50009 Zaragoza, Spain.

\* Corresponding author: randreu@unizar.es

**TABLE OF CONTENTS**

|                                                                                                                                           |               |
|-------------------------------------------------------------------------------------------------------------------------------------------|---------------|
| 1. General experimental methods                                                                                                           | page S3-S4    |
| 2. NMR studies                                                                                                                            | pages S5-S27  |
| 2.1. Analysis of the $^3J_{\text{HH}}$ in the study of the structure of compounds <b>5b</b> , <b>6a</b> , <b>7a</b> . (Figures S1 and S2) | page S5       |
| 2.2. Study of the torquoselectivity in the formation of compound <b>5b</b> (Figures S3 and S4)                                            | page S6-S7    |
| 2.3. NMR spectra for new compounds                                                                                                        |               |
| Figures S5 to S7 (NMR spectra of compound <b>5a</b> )                                                                                     | pages S8-S10  |
| Figures S8 to S10 (NMR spectra of compound <b>6a</b> )                                                                                    | pages S11-S13 |
| Figures S11 to S12 (NMR spectra of compound <b>7a</b> )                                                                                   | pages S14-S15 |
| Figures S13 to S15 (NMR spectra of compound <b>5b</b> )                                                                                   | pages S16-S18 |
| Figures S16 to S18 (NMR spectra of mixture <b>5c+8</b> )                                                                                  | pages S19-S21 |
| Figure S19 to S20 (NMR spectrum of compound <b>9</b> )                                                                                    | pages S22-S23 |
| Figures S21 to S22 (NMR spectra of compound <b>7c</b> )                                                                                   | pages S24-S25 |

|                                                                                                                                        |               |
|----------------------------------------------------------------------------------------------------------------------------------------|---------------|
| Figures S23 to S24 (NMR spectra of compound <b>10</b> )                                                                                | pages S26-S27 |
| <b>3.</b> Non-concerted dipolar mechanisms<br>(Figure S25)                                                                             | page S28      |
| <b>4.</b> X-Ray diffraction                                                                                                            | pages S29-S43 |
| Compound <b>5a</b>                                                                                                                     | pages S29-S33 |
| Compound <b>7c</b>                                                                                                                     | pages S34-S38 |
| Compound <b>10</b>                                                                                                                     | pages S39-S43 |
| <b>5.</b> UV-vis spectra                                                                                                               | pages S44-S49 |
| Figures S41 to S52 (UV-Vis absorption in CH <sub>2</sub> Cl <sub>2</sub> , dioxane, DMF and CHCl <sub>3</sub> )                        |               |
| <b>6.</b> Theoretical calculations                                                                                                     | pages S50-S58 |
| Figure S53 (HOMO and LUMO contour plots<br>(PCM-B3P86/6-31G**/B3P86-31G* in CH <sub>2</sub> Cl <sub>2</sub> ) for compound <b>5a</b> ) | page S58      |
| Figure S54 (HOMO and LUMO contour plots<br>(PCM-B3P86/6-31G**/B3P86-31G* in CH <sub>2</sub> Cl <sub>2</sub> ) for compound <b>7a</b> ) | page S58      |
| <b>7.</b> NLO measurements                                                                                                             | page S59      |

## 1. General Experimental Methods

Infrared measurements were carried out in nujol mulls using a Perkin-Elmer Fourier Transform Infrared 1600 spectrometer. Melting points were obtained on a Gallenkamp apparatus in open capillaries and are uncorrected. Elemental analysis was performed with a Perkin-Elmer 240C microanalyzer.  $^1\text{H}$ - and  $^{13}\text{C}$ -NMR spectra were recorded on a Bruker ARX300 or a Bruker AV400 at 300 or 400 MHz and 75 or 100 MHz respectively;  $\delta$  values are given in ppm (relative to TMS) and  $J$  values in Hz. The apparent resonance multiplicity is described as a s (singlet), br s (broad singlet), d (doublet), t (triplet), q (quartet) and m (multiplet).  $^1\text{H}$ - $^1\text{H}$  COSY experiments were recorded at 400 MHz in order to establish peaks assignment and spatial relationships. Selective ge-1D NOESY experiments (mixing time: 0.6-1.2 s; selective 180 pulse: 20-40 ms) were recorded at 300 MHz for compound **5b**, in order to determine the regio- and torquoselectivity of the reaction and the conformation of TCF moiety. Electrospray mass spectra were recorded on a Bruker Q-ToF spectrometer; accurate mass measurements were achieved using sodium formate as external reference. Electronic spectra were recorded with an UV-Vis UNICAM UV4 spectrophotometer. The spectra were measured in  $\text{CH}_2\text{Cl}_2$  and in dioxane. The absorption wavelengths are reported in nm with  $\log \epsilon$  in parenthesis; shoulders are indicated as sh. Cyclic voltammetry measurements were performed with a  $\mu$ -Autolab ECO-Chemie potentiostat, using a glassy carbon working electrode, Pt counter electrode, and Ag/AgCl reference electrode. The experiments were carried out under argon, in  $\text{CH}_2\text{Cl}_2$ , with  $\text{Bu}_4\text{NPF}_6$  as supporting electrolyte ( $0.1 \text{ mol L}^{-1}$ ). Scan rate was  $100 \text{ mV s}^{-1}$ .

X-Ray data collection were carried out on a diffractometer equipped with a graphite monochromator utilizing Mo  $\text{K}\alpha$  radiation ( $\lambda = 0.71073 \text{ \AA}$ ). The diffraction frames (compounds **7c** and **10**) were integrated and corrected for absorption using the CrysAlis RED package.<sup>1</sup> For compound **5a** the CrysAlis RED package<sup>2</sup> was used. The structures were solved by direct methods.<sup>3</sup> All refinements were carried out using SHELXL-97<sup>4</sup> against the  $F^2$  data

---

(1) CrysAlisPro, Oxford Diffraction Ltd., Version 1.171.34.44 (release 25-10-2010 CrysAlis171. NET) (compiled Oct 25 2010,18:11:34).

(2) CrysAlisPro, Oxford Diffraction Ltd., Version 1.171.32.19 (release 28-02-2008 CrysAlis171. NET) (compiled Feb 28 2008,12:10:31).

(3) (a) Altomare, A.; Cascarano, G.; Giacovazzo, C.; Guagliardi, A. *J. Appl. Crystallogr.* **1993**, *26*, 343–350. (b) Palatinus, L.; Chapuis, G. *J. Appl. Crystallogr.* **2007**, *40*, 786–790.

(4) Sheldrick, G. M. *Acta Crystallogr., Sect. A* **2008**, *64*, 112–122.

using full-matrix least squares methods. All non-hydrogen atoms were refined with anisotropic displacement parameters. All hydrogen atoms were placed at idealized positions and assigned isotropic displacement parameters 1.2 times the  $U_{\text{iso}}$  value of the corresponding bonding partner (1.5 times for methyl hydrogen atoms, except C22 and C23 (1.2 times) in **5a**).

All theoretical calculations were performed by using the Gaussian 09<sup>5</sup> program. The molecular geometries were optimized using the B3P86<sup>6</sup> functional and the 6-31G\*<sup>7</sup> basis set. Solvent effect was studied by placing the solute in a cavity within the solvent reaction field and using the Polarizable Continuum Model (PCM).<sup>8</sup>

For NLO measurements, see Section 7, page S53.

---

(5) Gaussian 09, Revision A.02, Frisch, M. J.; Trucks, G. W.; Schlegel, H. B.; Scuseria, G. E.; Robb, M. A.; Cheeseman, J. R.; Scalmani, G.; Barone, V.; Mennucci, B.; Petersson, G. A.; Nakatsuji, H.; Caricato, M.; Li, X.; Hratchian, H. P.; Izmaylov, A. F.; Bloino, J.; Zheng, G.; Sonnenberg, J. L.; Hada, M.; Ehara, M.; Toyota, K.; Fukuda, R.; Hasegawa, J.; Ishida, M.; Nakajima, T.; Honda, Y.; Kitao, O.; Nakai, H.; Vreven, T.; Montgomery, Jr., J. A.; Peralta, J. E.; Ogliaro, F.; Bearpark, M.; Heyd, J. J.; Brothers, E.; Kudin, K. N.; Staroverov, V. N.; Kobayashi, R.; Normand, J.; Raghavachari, K.; Rendell, A.; Burant, J. C.; Iyengar, S. S.; Tomasi, J.; Cossi, M.; Rega, N.; Millam, N. J.; Klene, M.; Knox, J. E.; Cross, J. B.; Bakken, V.; Adamo, C.; Jaramillo, J.; Gomperts, R.; Stratmann, R. E.; Yazyev, O.; Austin, A. J.; Cammi, R.; Pomelli, C.; Ochterski, J. W.; Martin, R. L.; Morokuma, K.; Zakrzewski, V. G.; Voth, G. A.; Salvador, P.; Dannenberg, J. J.; Dapprich, S.; Daniels, A. D.; Farkas, Ö.; Foresman, J. B.; Ortiz, J. V.; Cioslowski, J.; Fox, D. J. Gaussian, Inc., Wallingford CT, 2009.

(6) The B3P86 Functional consists of Becke's three parameter hybrid functional (Becke, A.D. *J. Chem. Phys.* **1993**, *98*, 5648–5652) with the nonlocal correlation provided by the Perdew 86 expression: Perdew, J. P. *Phys. Rev. B* **1986**, *33*, 8822–8824.

(7) Hariharan, P. C.; Pople, J. A. *Theor. Chim. Acta* **1973**, *28*, 213–222.

(8) Tomasi, J.; Mennucci, B.; Cammi, R. *Chem. Rev.* **2005**, *105*, 2999–3093.

## 2. NMR studies

### 2.1. Analysis of the $^3J_{\text{HH}}$ in the study of the structure of compounds **5b**, **6a**, **7a**

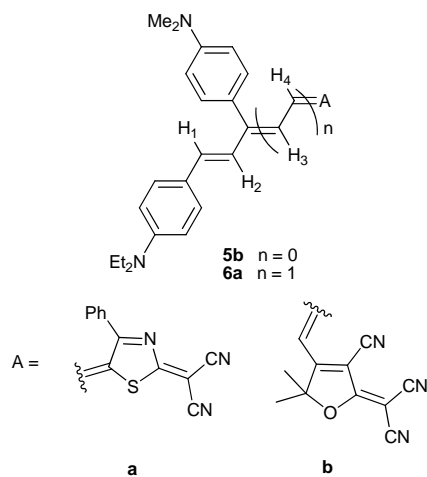

| Compd     | $\delta(^3J_{\text{HH}})$ |                |                |                |
|-----------|---------------------------|----------------|----------------|----------------|
|           | H <sub>1</sub>            | H <sub>2</sub> | H <sub>3</sub> | H <sub>4</sub> |
| <b>5b</b> | 7.01 (15.3 Hz)            | 7.14 (15.3 Hz) | -              | -              |
| <b>6a</b> | 7.13 (15.3 Hz)            | 6.99 (15.3 Hz) | 6.62 (12.8 Hz) | 7.63 (12.8 Hz) |

**Figure S1:** Chemical shift ( $\delta$ , ppm) and  $^3J_{\text{HH}}$  (Hz) for compounds **5b** and **6a** (Spectra recorded in  $\text{CD}_2\text{Cl}_2$  at 400 MHz).

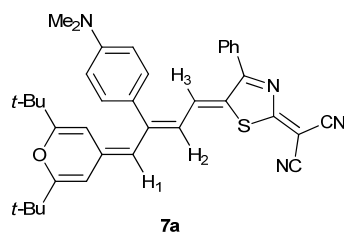

| Compd     | $\delta(^3J_{\text{HH}})$ |                |                |
|-----------|---------------------------|----------------|----------------|
|           | H <sub>1</sub>            | H <sub>2</sub> | H <sub>3</sub> |
| <b>7a</b> | 6.10                      | 6.58 (13.3 Hz) | 7.46 (13.3 Hz) |

**Figure S2:** Chemical shift ( $\delta$ , ppm) and  $^3J_{\text{HH}}$  (Hz) for compound **7a** (Spectrum recorded in  $\text{CD}_2\text{Cl}_2$  at 300 MHz).

## 2.2. Study of the torquoselectivity in the formation of compound 5b

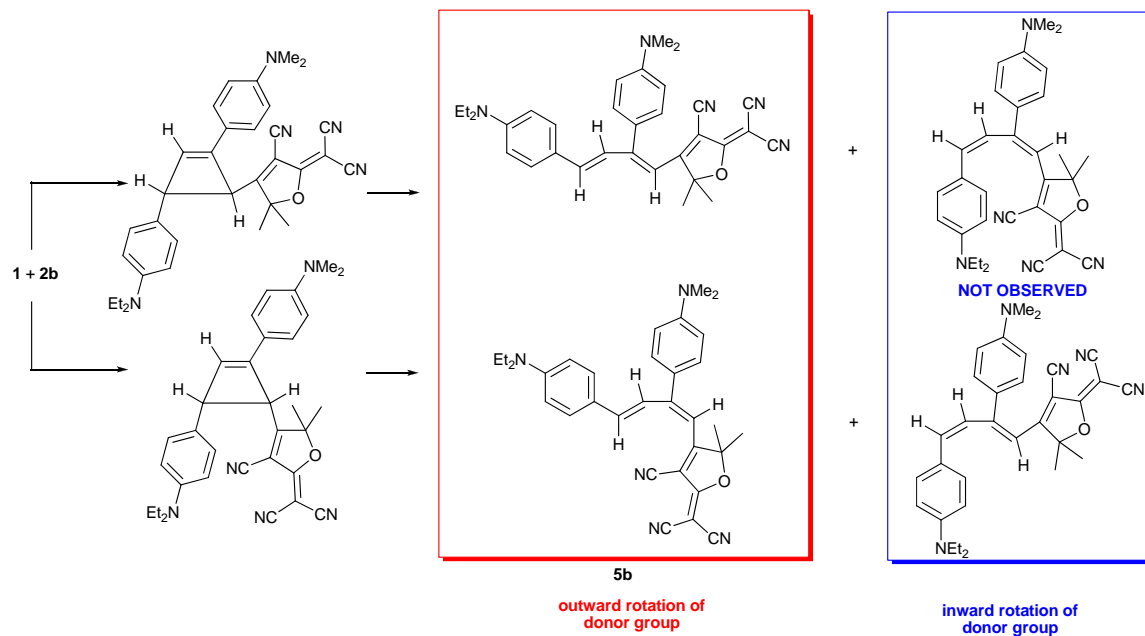

**Figure S3:** Torquoselective formation of **5b**.

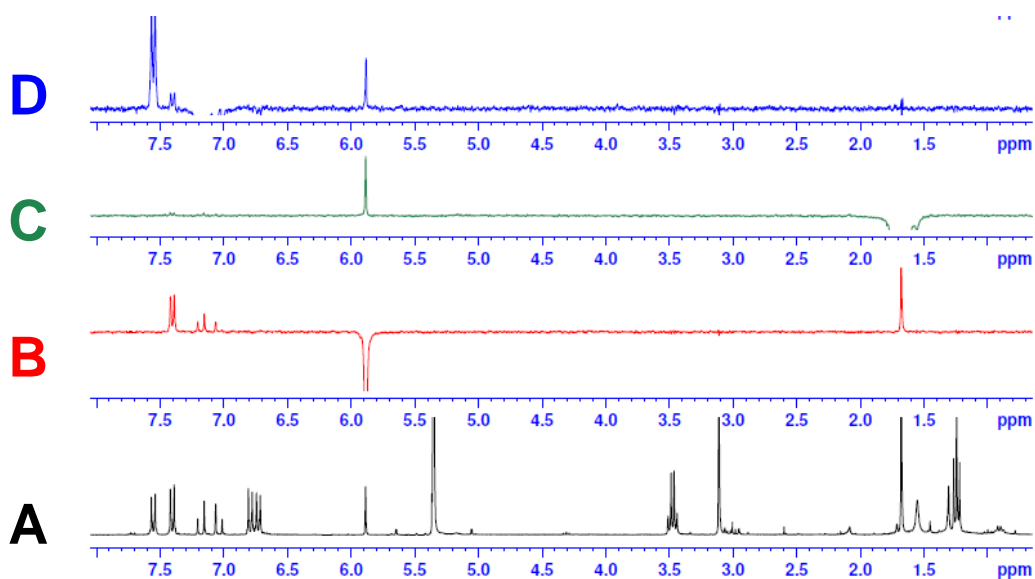

**Figure S4:** Selective NOE experiments for compound **5b** (300 MHz, 298 K, CD<sub>2</sub>Cl<sub>2</sub>).

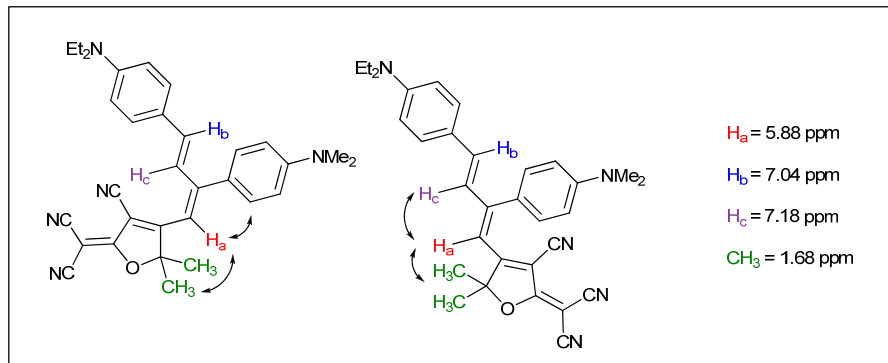

A) <sup>1</sup>H spectrum.

B) Spectrum after saturation of  $H_a$  ( $\delta = 5.88$  ppm) (mixing time: 1.1 s).

C) Spectrum after saturation of  $CH_3$  ( $\delta = 1.68$  ppm) (mixing time: 0.6 s).

D) Spectrum after saturation of  $H_c$  ( $\delta = 7.18$  ppm) (mixing time: 1.2 s)

### 2.3. NMR spectra for new compounds

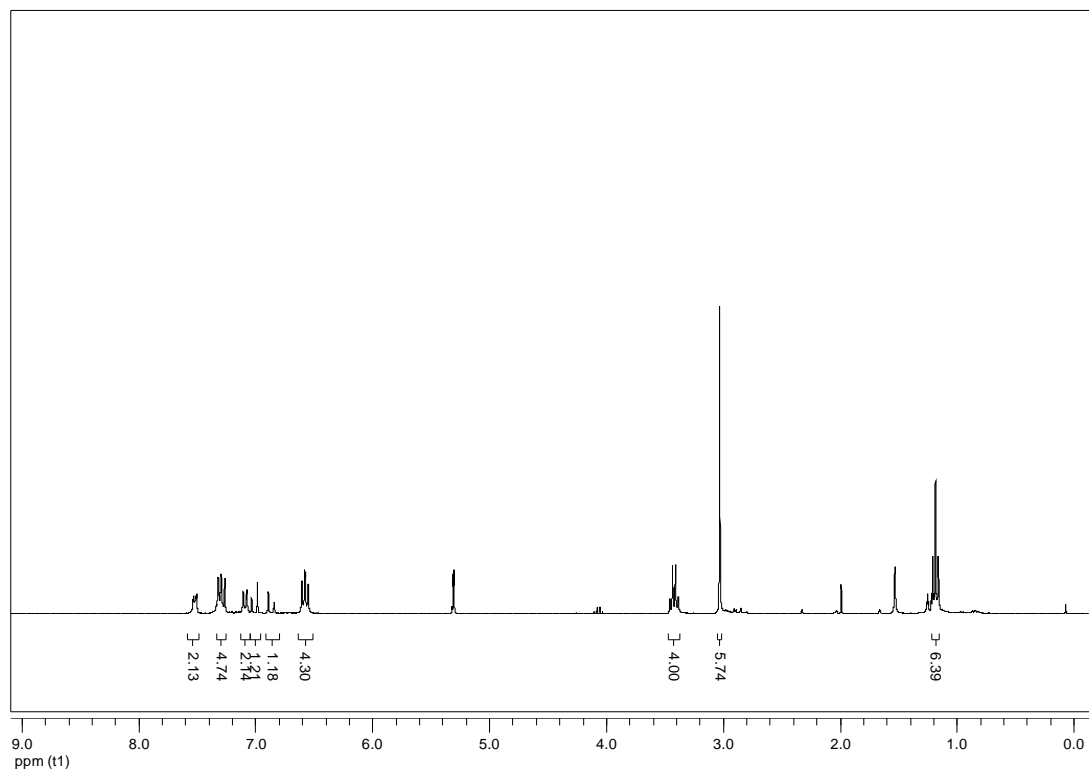

**Figure S5:** <sup>1</sup>H-NMR spectrum of compound **5a** (300 MHz, CD<sub>2</sub>Cl<sub>2</sub>).

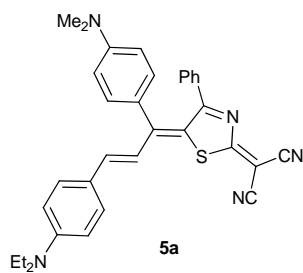



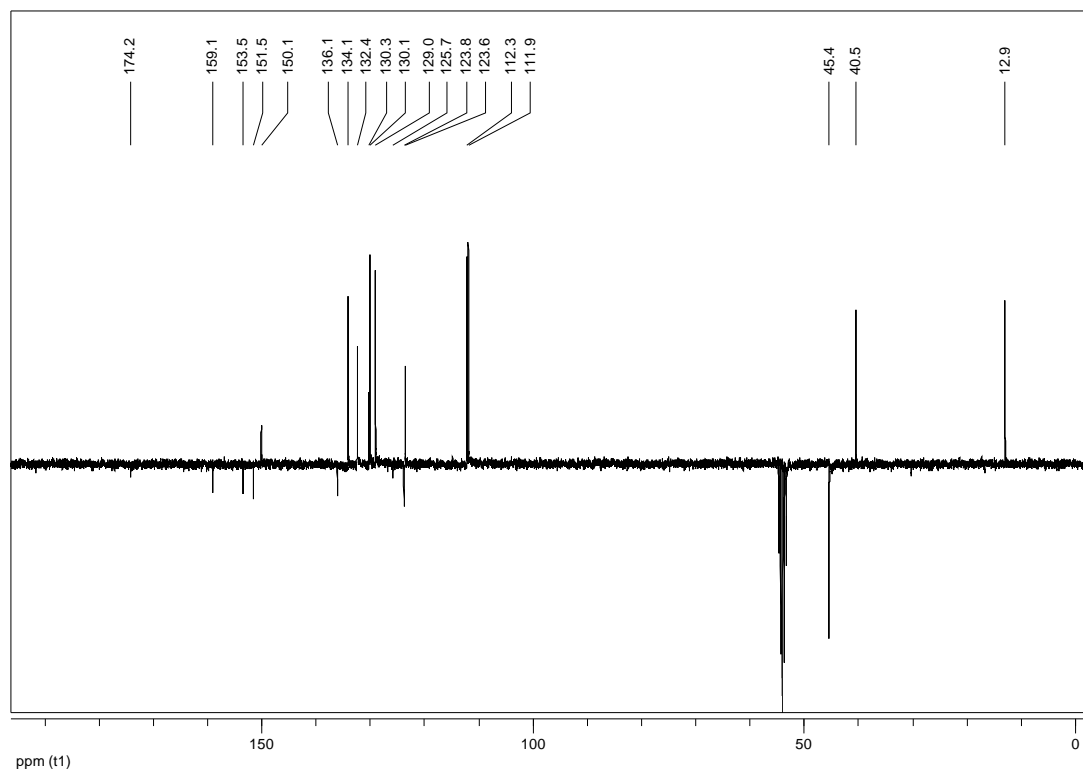

**Figure S6:**  $^{13}\text{C}$ -NMR (APT) spectrum of compound **5a** (75 MHz,  $\text{CD}_2\text{Cl}_2$ ).

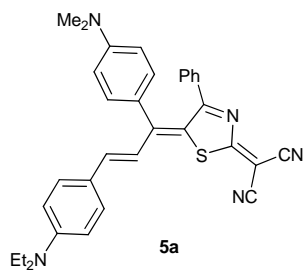

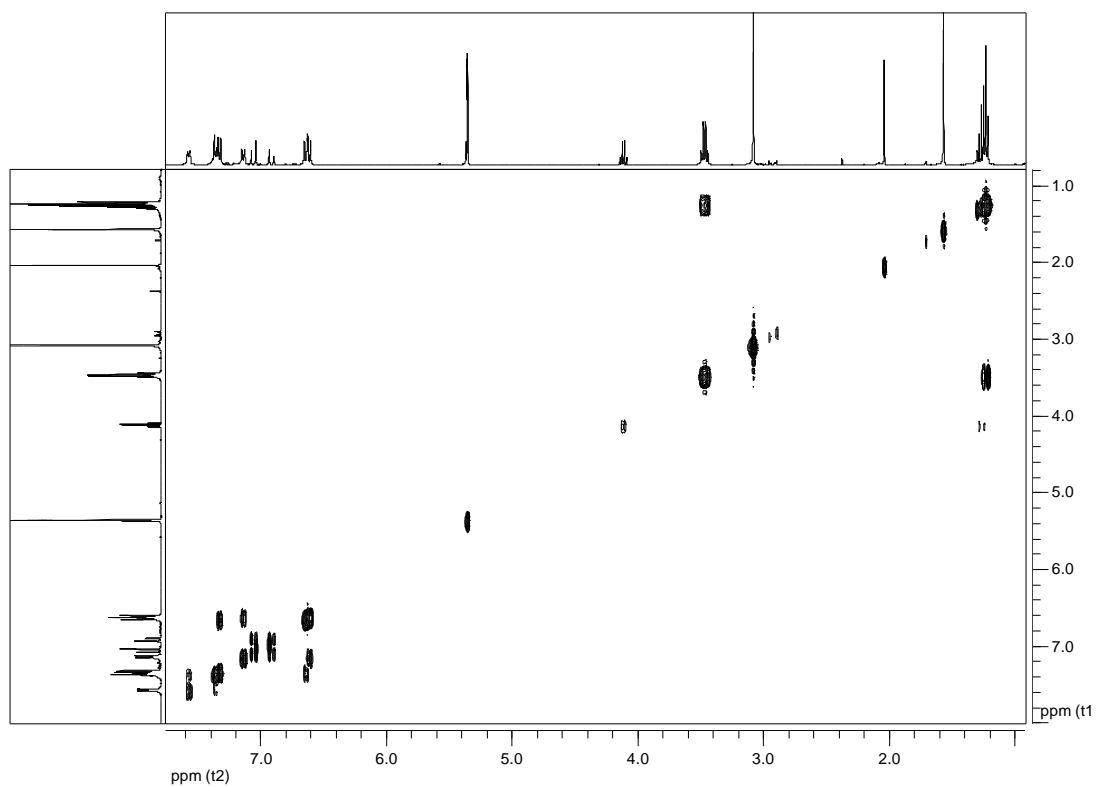

**Figure S7:**  $^1\text{H}$ - $^1\text{H}$  COSY spectrum of compound **5a** (400 MHz,  $\text{CD}_2\text{Cl}_2$ ).

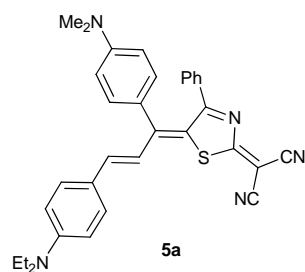

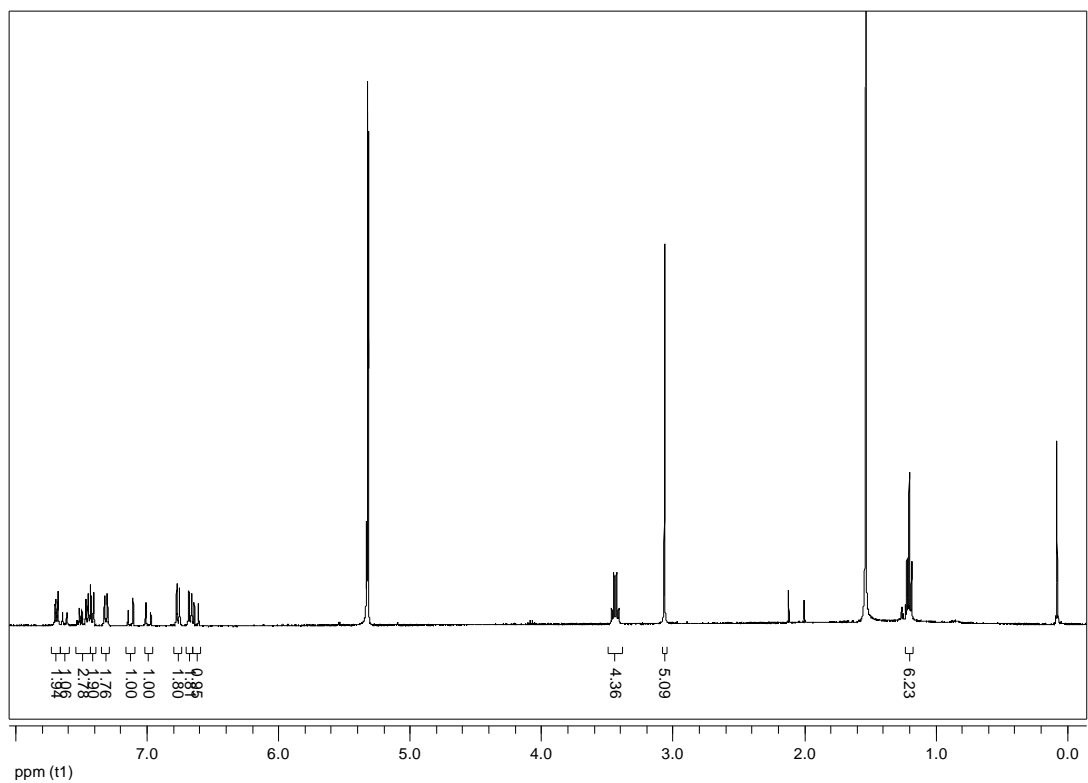

**Figure S8:**  $^1\text{H}$ -NMR spectrum of compound **6a** (400 MHz,  $\text{CD}_2\text{Cl}_2$ ).

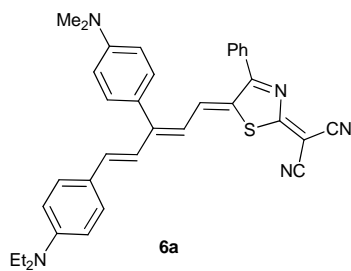

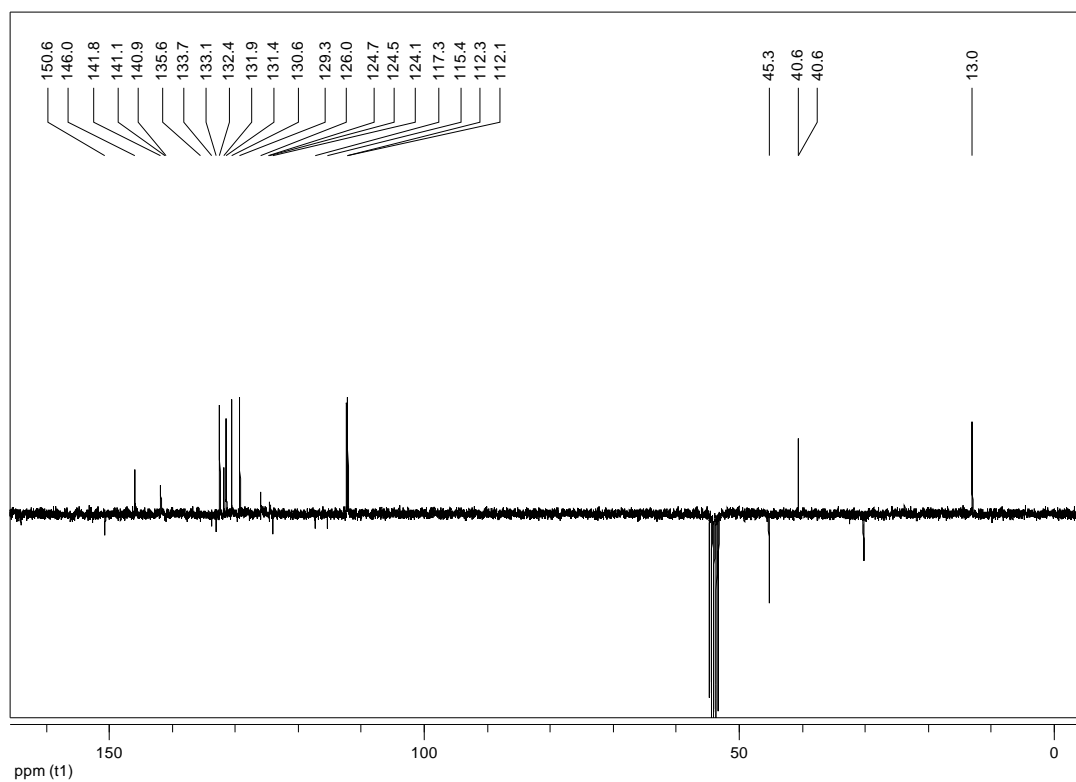

**Figure S9:**  $^{13}\text{C}$ -NMR (APT) spectrum of compound **6a** (75 MHz,  $\text{CD}_2\text{Cl}_2$ ).

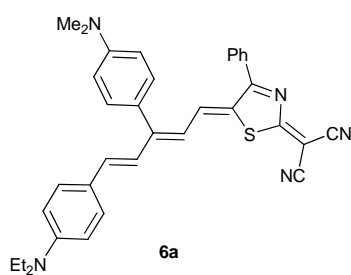

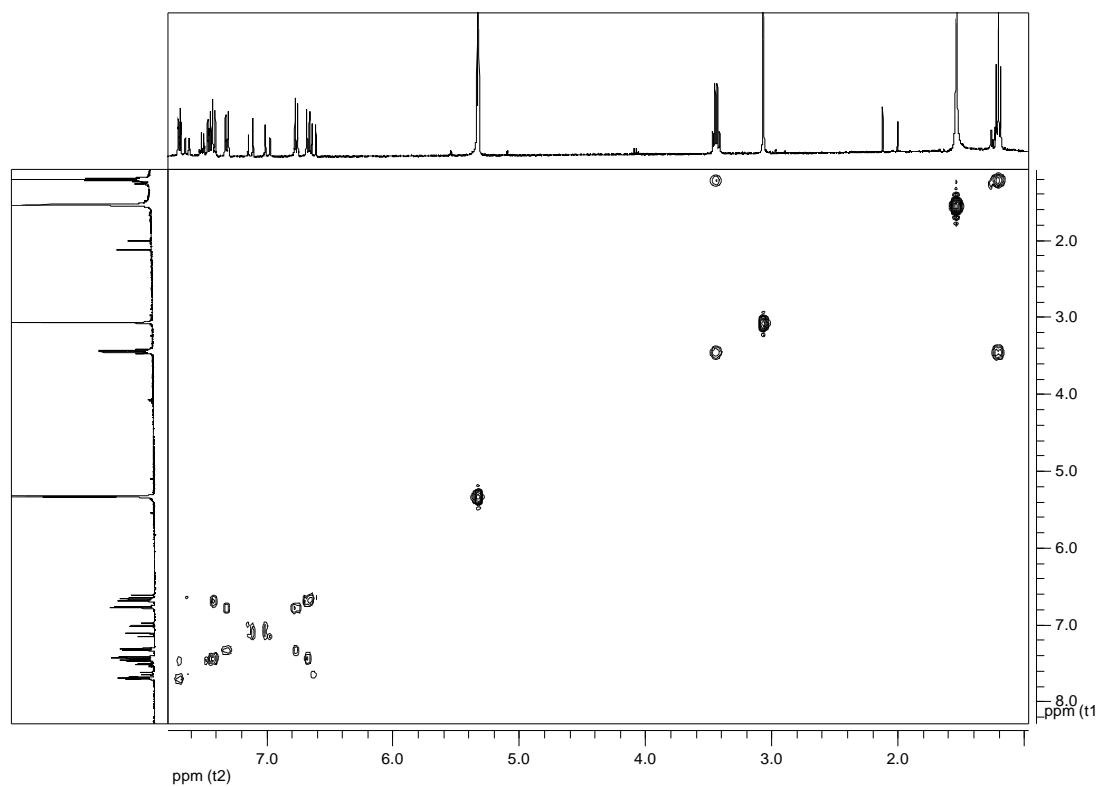

**Figure S10:**  $^1\text{H}$ - $^1\text{H}$  COSY spectrum of compound **6a** (400 MHz,  $\text{CD}_2\text{Cl}_2$ ).

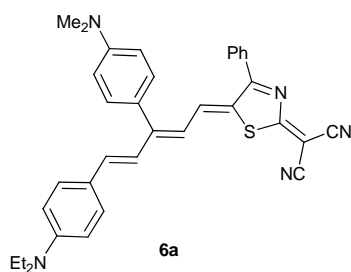

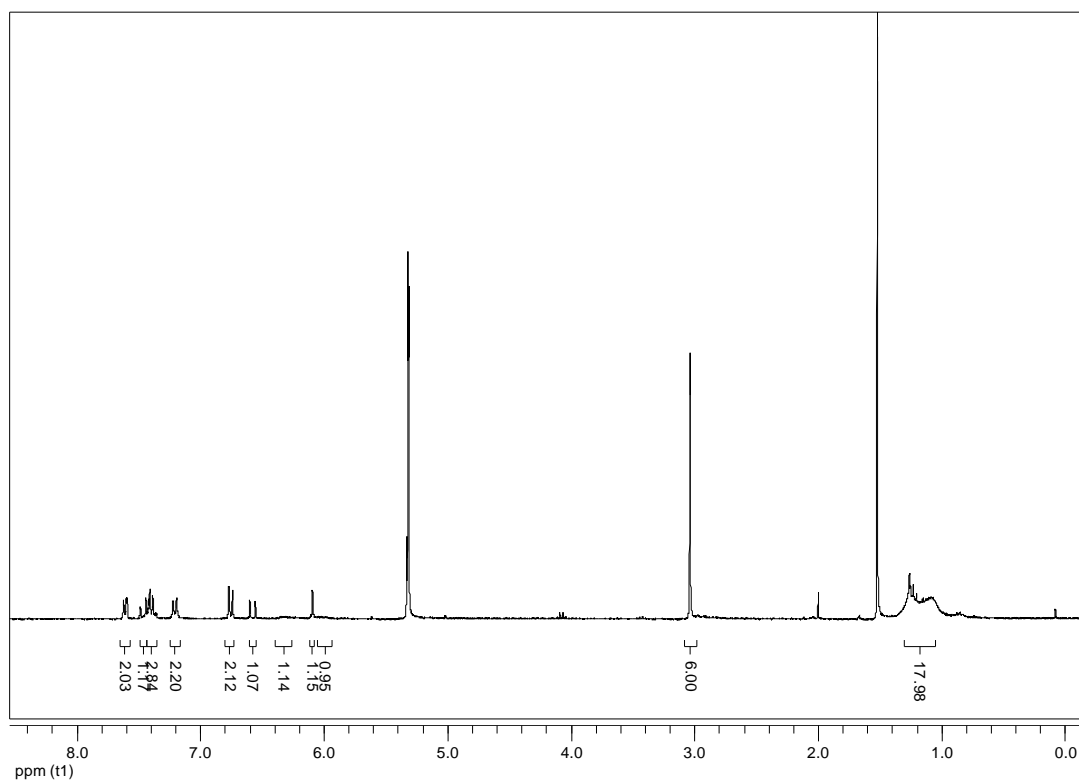

**Figure S11:** <sup>1</sup>H-NMR spectrum of compound **7a** (300 MHz, CD<sub>2</sub>Cl<sub>2</sub>).

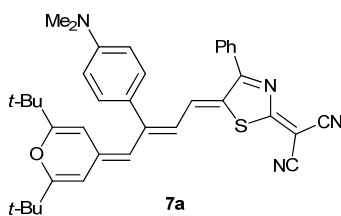

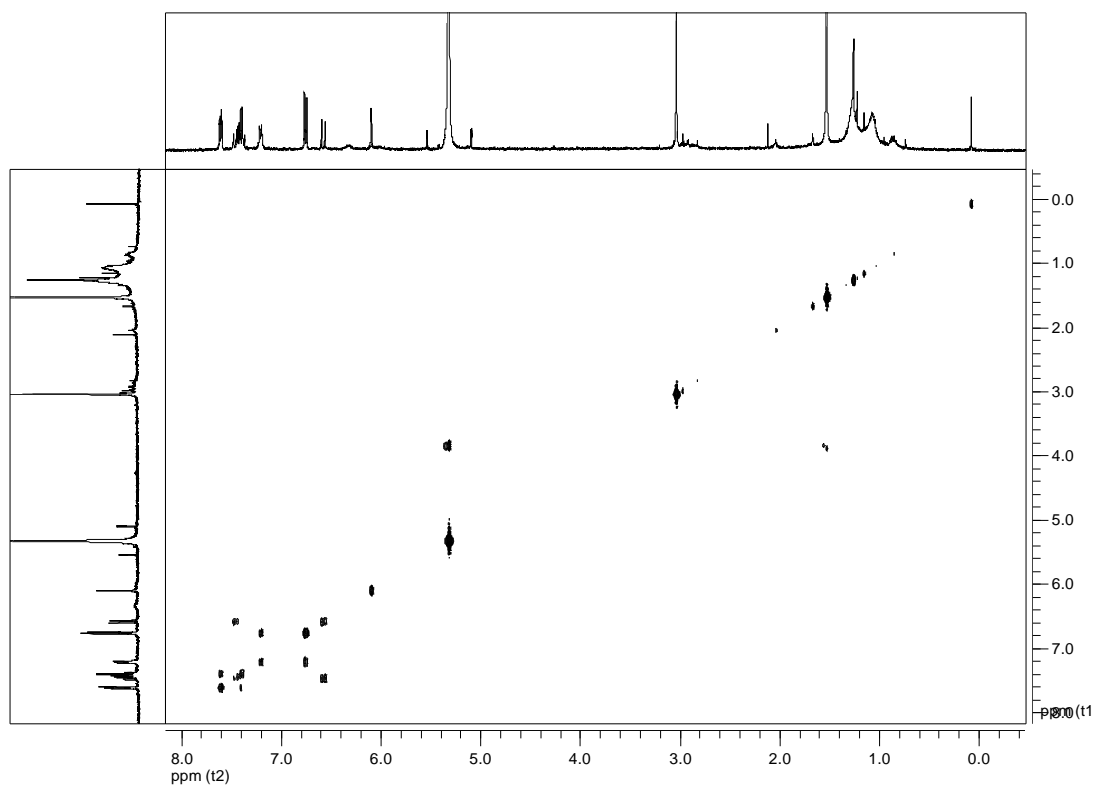

**Figure S12:**  $^1\text{H}$ - $^1\text{H}$  COSY spectrum of compound **7a** (400 MHz,  $\text{CD}_2\text{Cl}_2$ ).

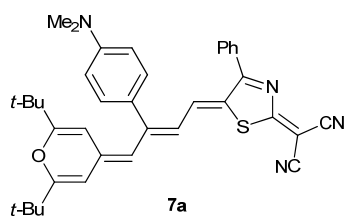

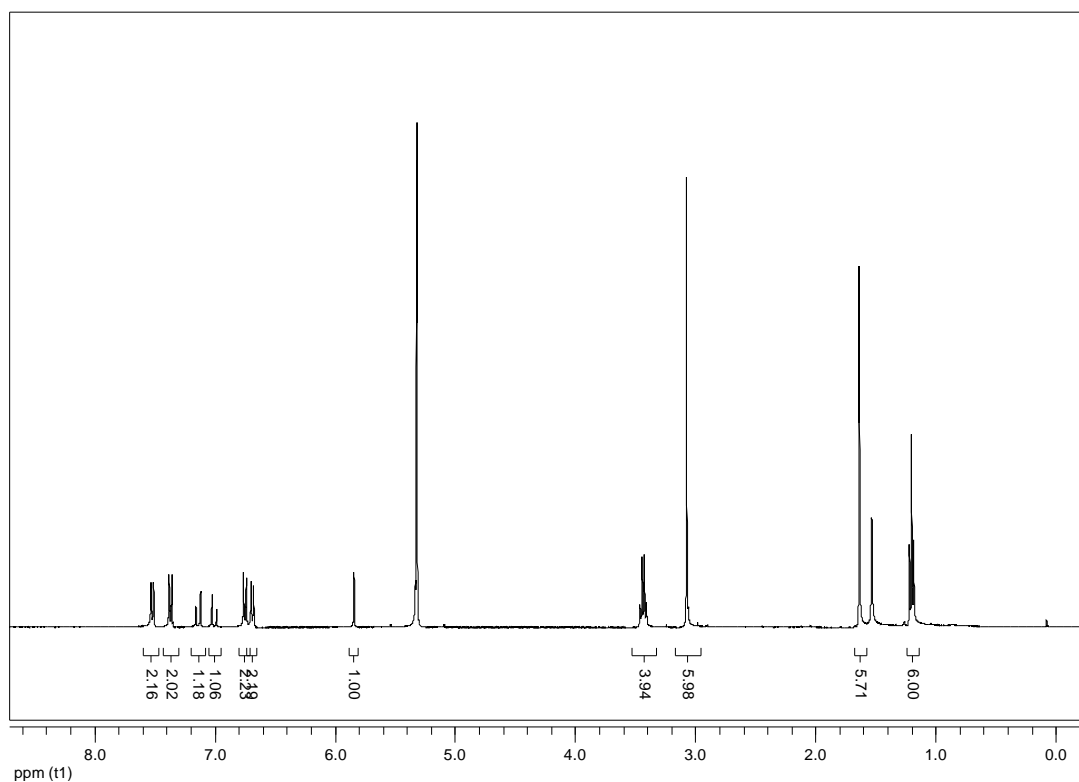

**Figure S13:** <sup>1</sup>H-NMR spectrum of compound **5b** (400 MHz, CD<sub>2</sub>Cl<sub>2</sub>).

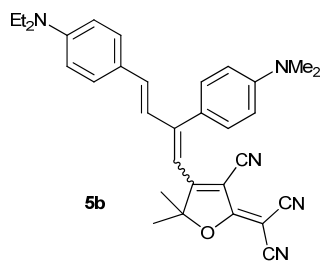



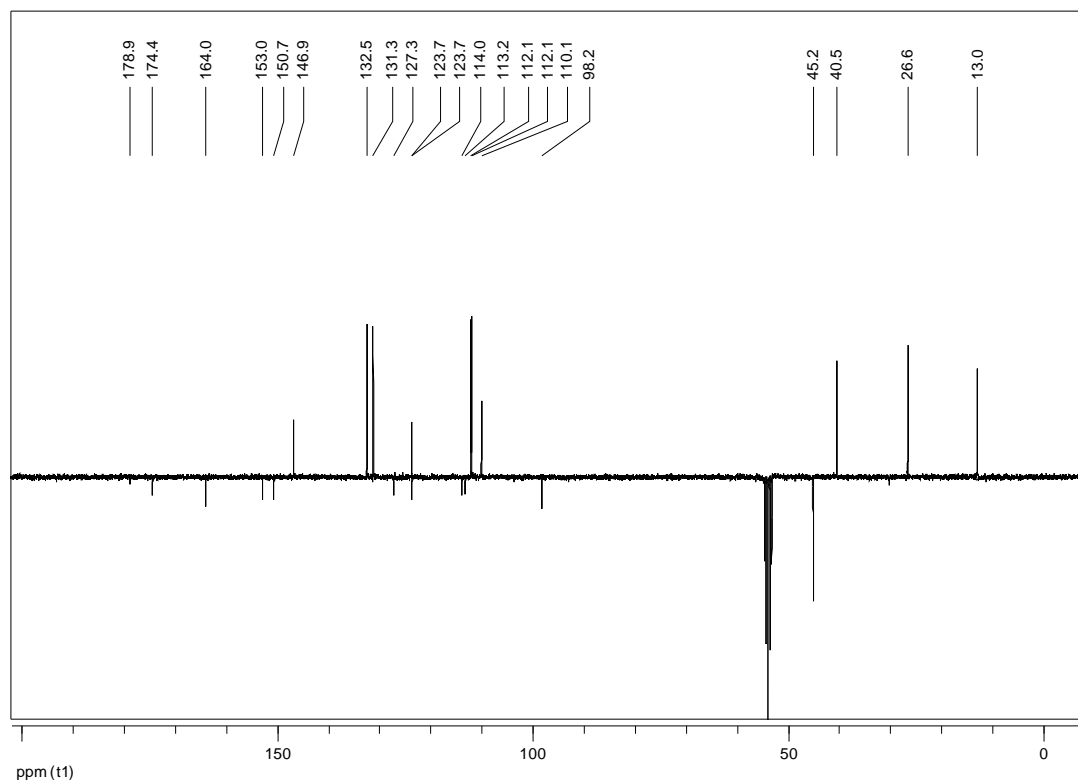

**Figure S14:**  $^{13}\text{C}$ -NMR (APT) spectrum of compound **5b** (75 MHz,  $\text{CD}_2\text{Cl}_2$ ).

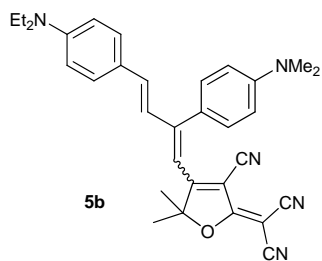

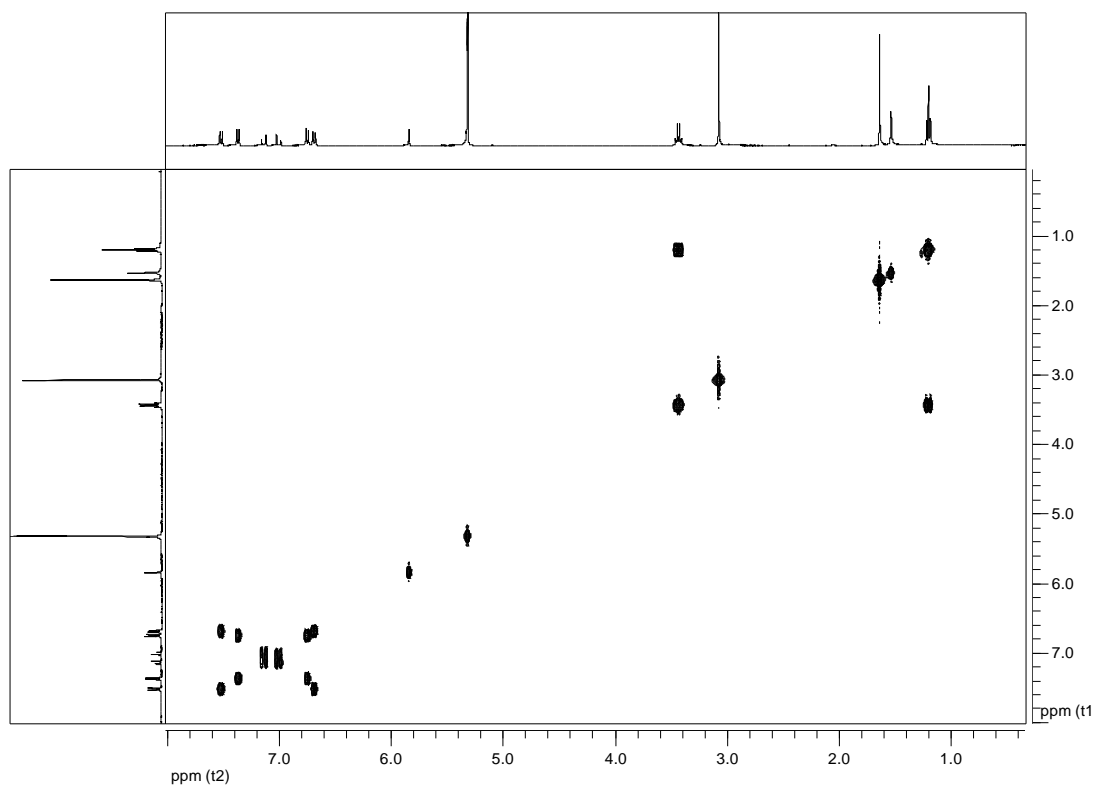

**Figure S15:**  $^1\text{H}$ - $^1\text{H}$  COSY spectrum of compound **5b** (400 MHz,  $\text{CD}_2\text{Cl}_2$ ).

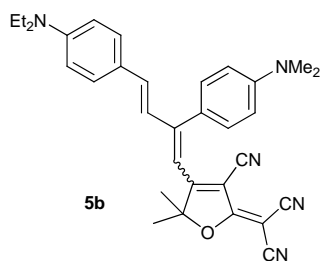

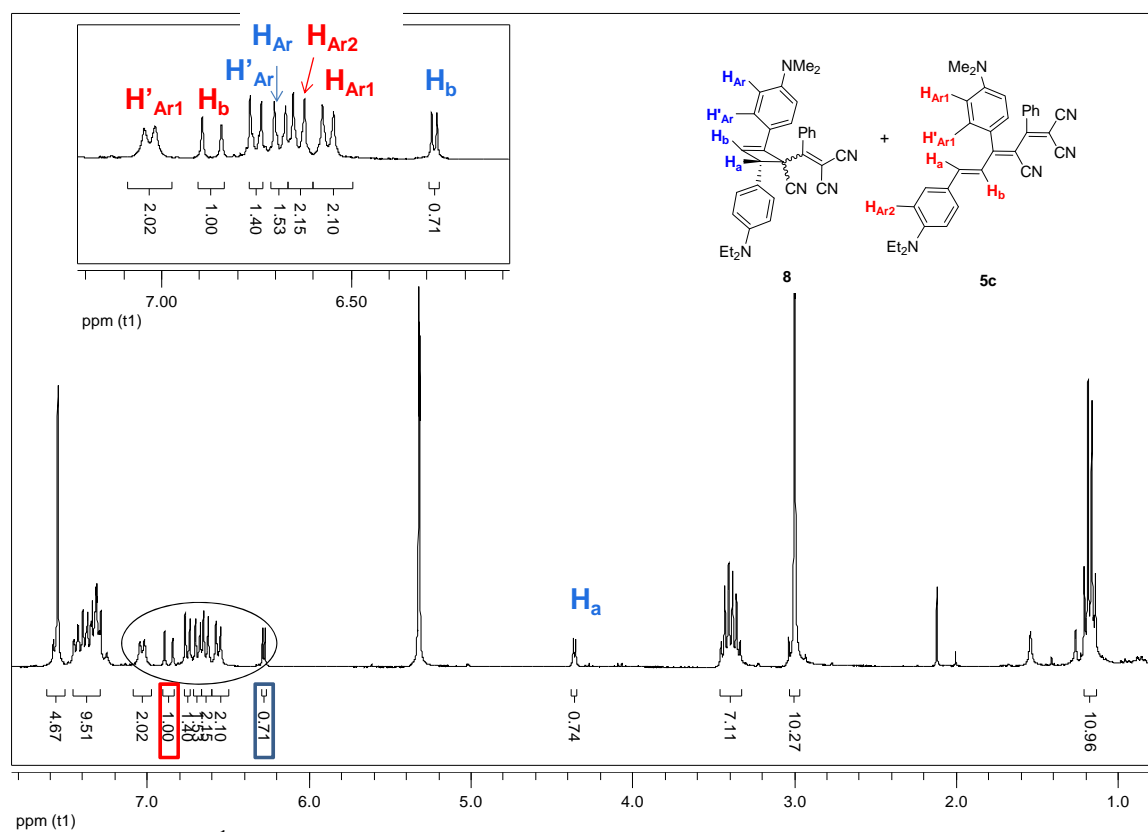

**Figure S16:** <sup>1</sup>H-NMR spectrum of mixture **5c**+**8** (ratio 10/7) (300 MHz, CD<sub>2</sub>Cl<sub>2</sub>).

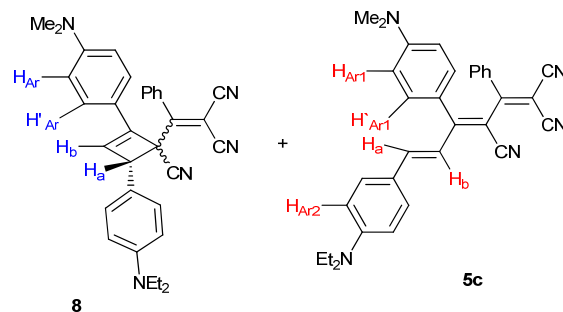

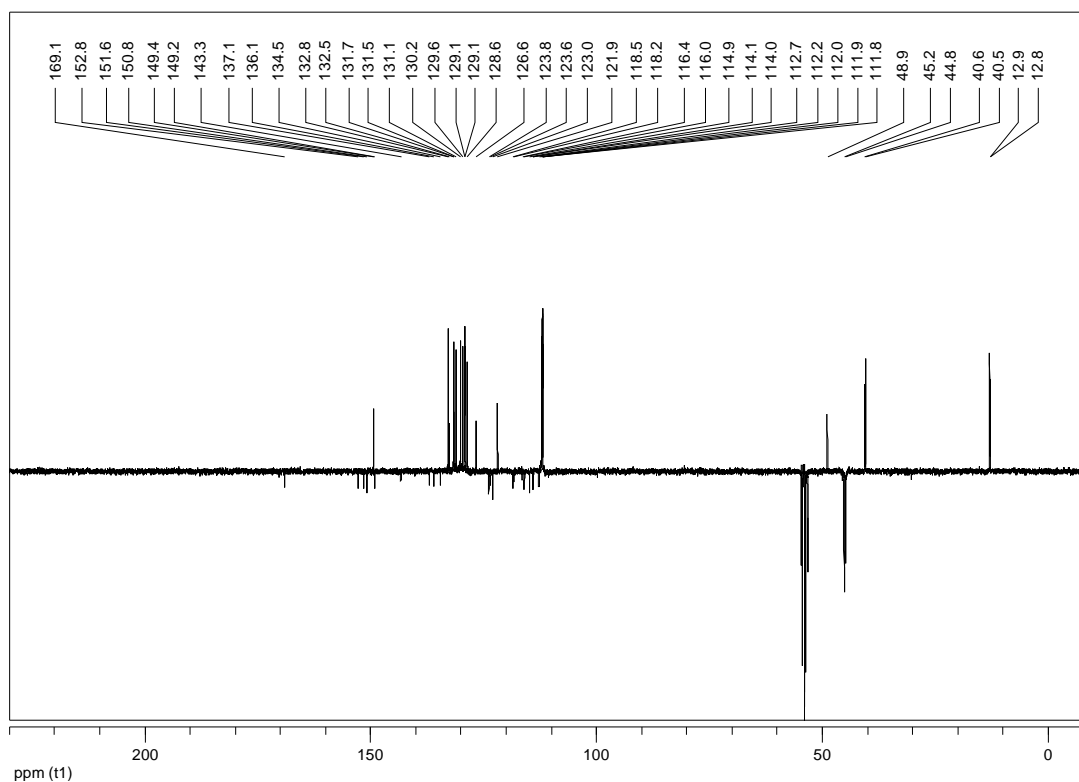

**Figure S17:**  $^{13}\text{C}$ -NMR (APT) spectrum of mixture **5c**+**8** (ratio 10/7) (75 MHz,  $\text{CD}_2\text{Cl}_2$ ).

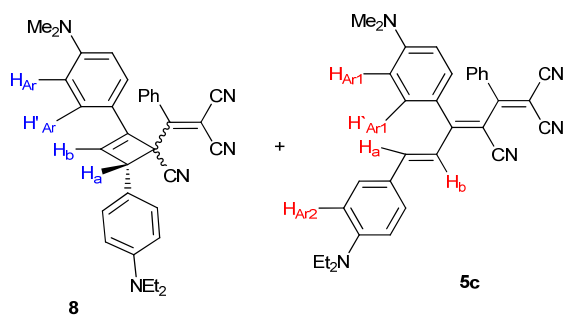

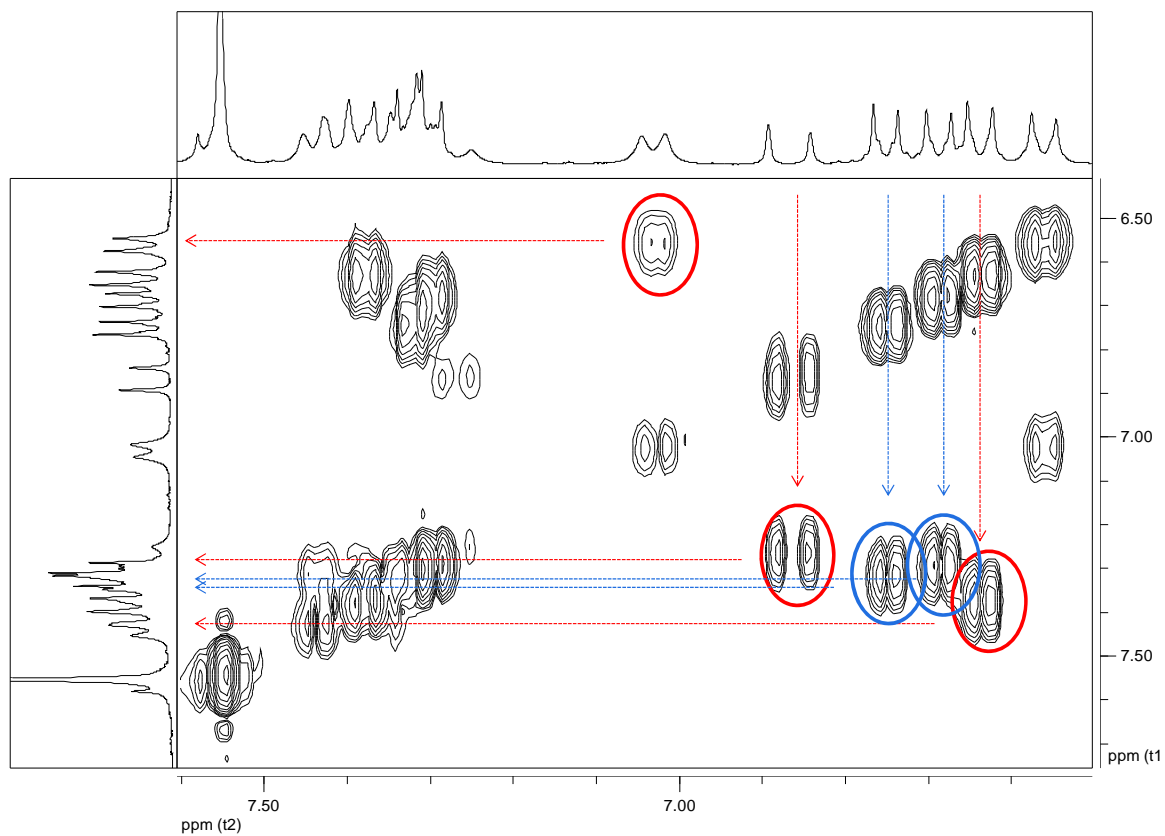

**Figure S18:**  $^1\text{H}$ - $^1\text{H}$  COSY spectrum of mixture **5c**+**8** (ratio 10/7) (400 MHz,  $\text{CD}_2\text{Cl}_2$ ).

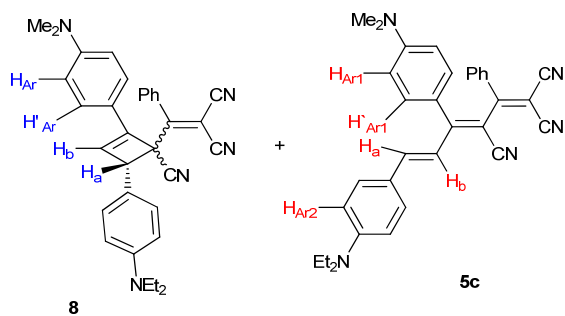

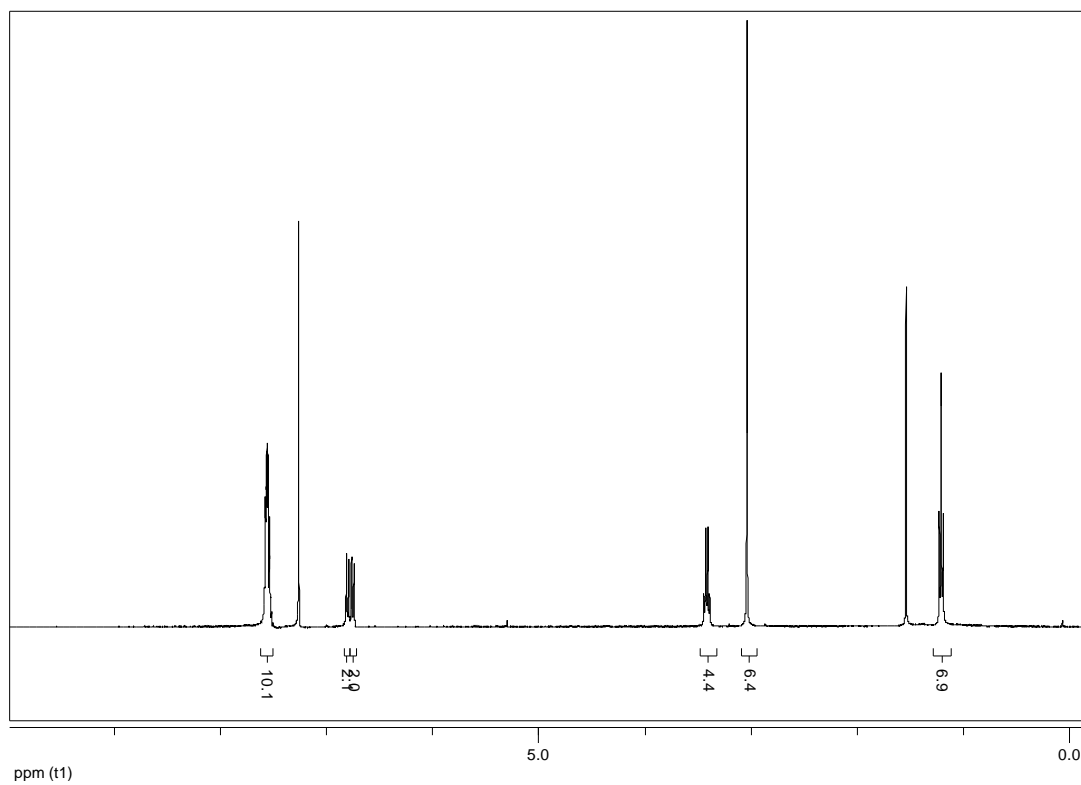

**Figure S19:**  $^1\text{H-NMR}$  spectrum of compound **9** (400 MHz,  $\text{CDCl}_3$ ).

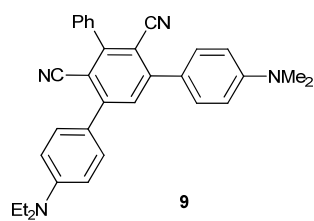

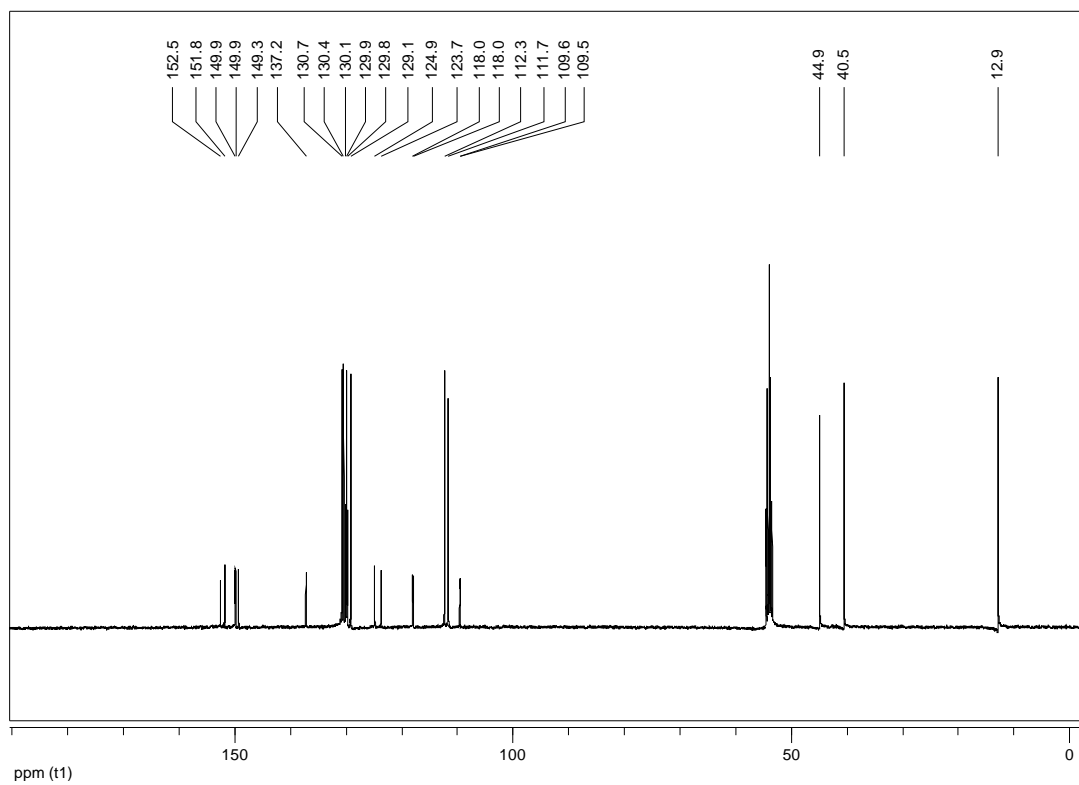

**Figure S20:**  $^{13}\text{C}$ -NMR spectrum of compound **9** (100 MHz,  $\text{CD}_2\text{Cl}_2$ ).

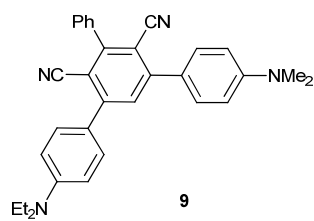

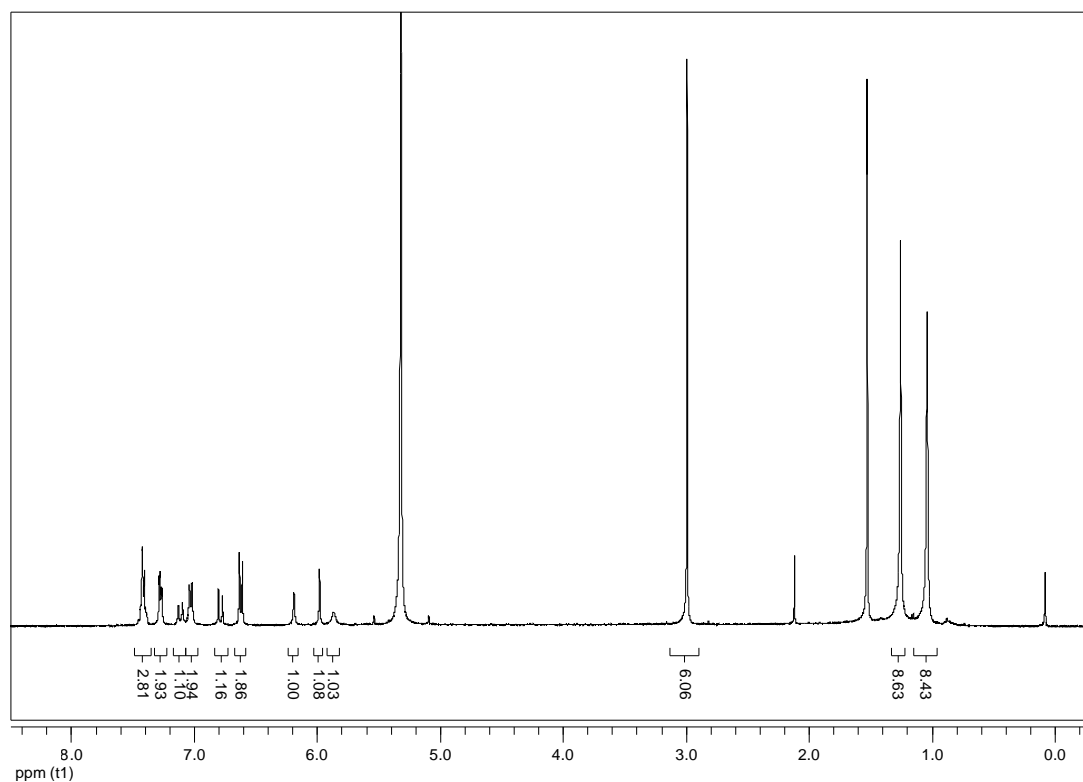

**Figure S21:** <sup>1</sup>H-NMR spectrum of compound **7c** (400 MHz, CD<sub>2</sub>Cl<sub>2</sub>).

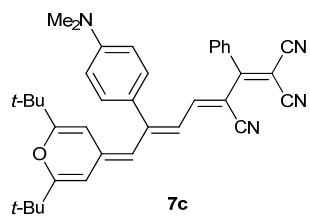



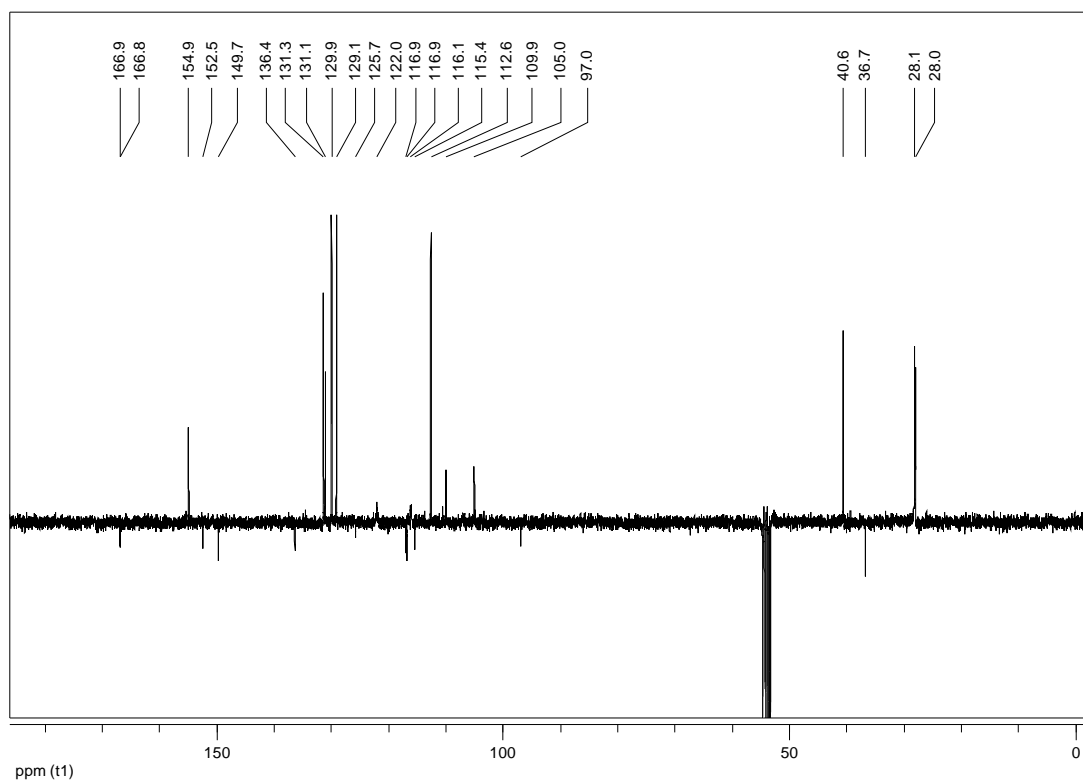

**Figure S22:**  $^{13}\text{C}$ -NMR (APT) spectrum of compound **7c** (75 MHz,  $\text{CD}_2\text{Cl}_2$ ).

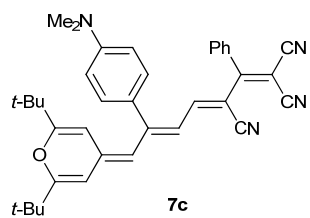

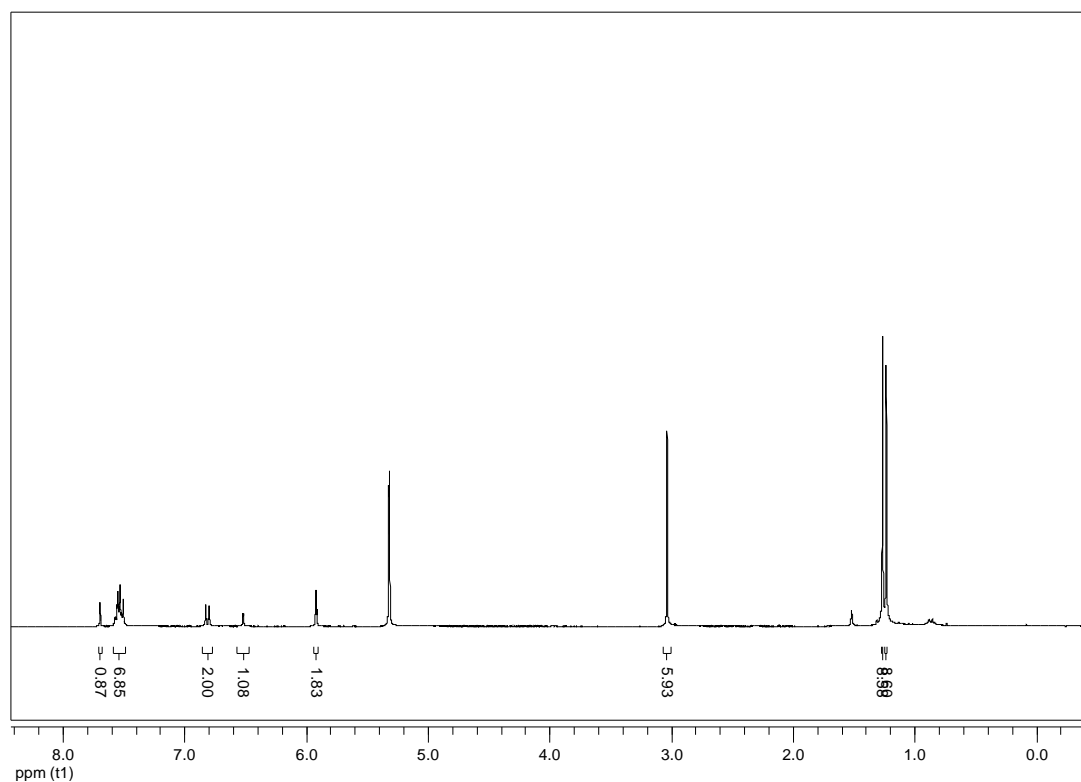

**Figure S23:** <sup>1</sup>H-NMR spectrum of compound **10** (300 MHz, CD<sub>2</sub>Cl<sub>2</sub>).

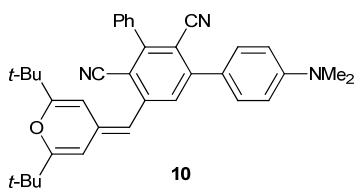

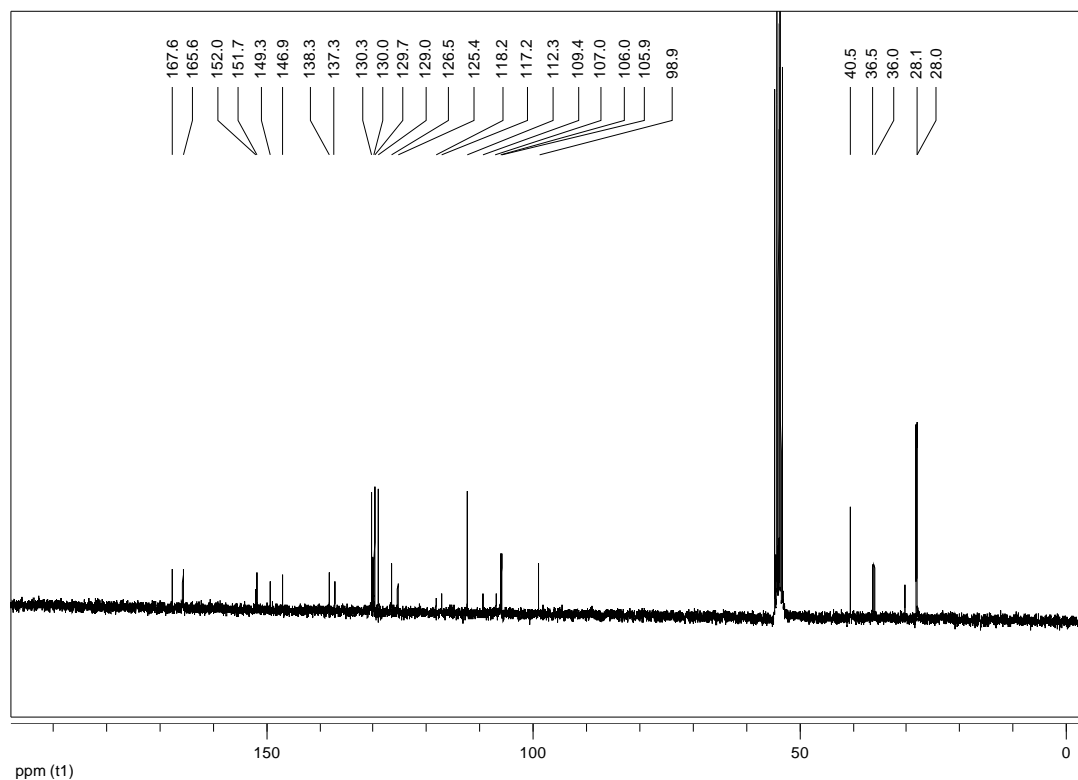

**Figure S24:**  $^{13}\text{C}$ -NMR spectrum of compound **10** (75 MHz,  $\text{CD}_2\text{Cl}_2$ ).

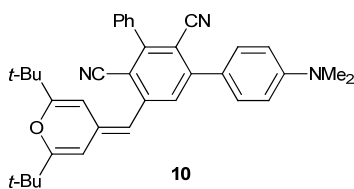

### 3. Non-concerted dipolar mechanisms

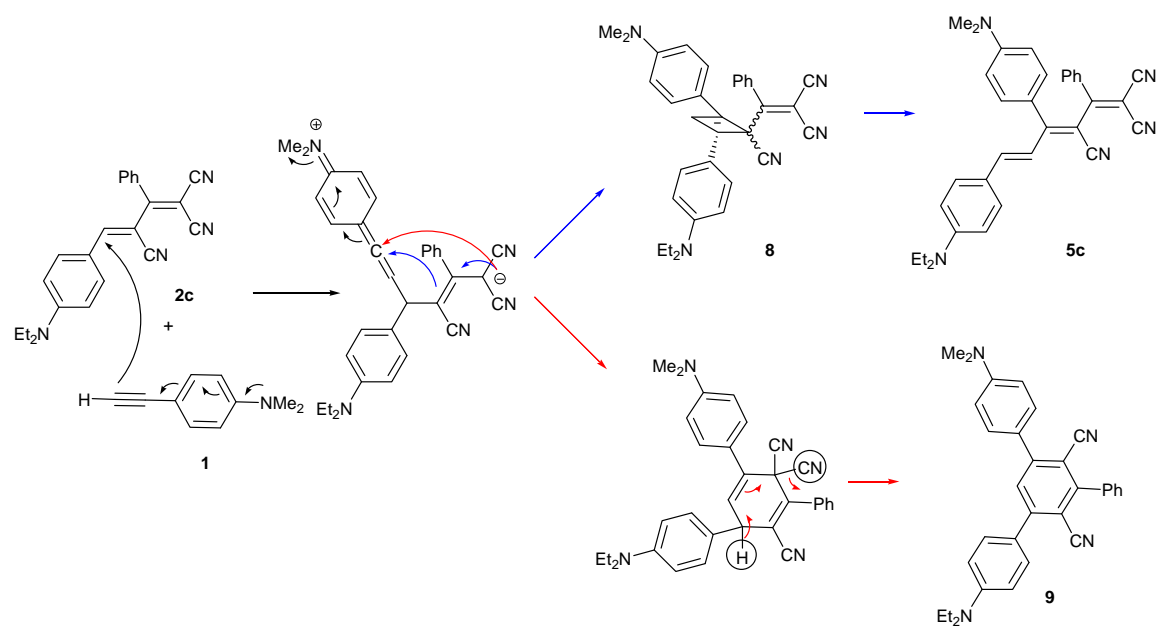

**Figure S25:** Non-concerted dipolar mechanism for the [2+2] (blue line) and [4+2] (red line) cycloaddition of **1** with **2c** in formation of a mixture of **5c** and **8** and **9** respectively.

## 4.- X-ray Diffraction

### Crystal data for 5a:

Single crystals were obtained by slow diffusion of hexane into a solution of the chromophore in AcOEt at room temperature: C<sub>33</sub>H<sub>31</sub>N<sub>5</sub>S, M<sub>r</sub> = 529.69, crystal dimensions 0.37 x 0.12 x 0.06 mm, triclinic space group P-1 (no. 2),  $\rho_{\text{calcd}} = 1.248 \text{ g cm}^{-3}$ , Z = 2, a = 8.5856(3), b = 13.3808(10), c = 13.8389(9) Å,  $\alpha = 66.612(7)$ ,  $\beta = 77.281(4)$ ,  $\gamma = 77.711(5)$ , V = 1409.37(15) Å<sup>3</sup> at 298(1) K. Number of measured and unique reflections 23380 and 4939, respectively ( $R_{\text{int}}=0.0973$ ). Final  $R(F)=0.0419$ ,  $wR(F^2)=0.0365$  for 354 parameters and 1804 reflections with  $I > 4\sigma(I)$  (corresponding R-values based on all 4939 reflections 0.1598 and 0.0424).

### Crystal data and structure refinement for 5a.

|                             |                                                                                                                                       |
|-----------------------------|---------------------------------------------------------------------------------------------------------------------------------------|
| Identification code         | 5a                                                                                                                                    |
| Empirical formula           | C33 H31 N5 S                                                                                                                          |
| Formula weight              | 529.69                                                                                                                                |
| Temperature                 | 298(1) K                                                                                                                              |
| Wavelength                  | 0.71073 Å                                                                                                                             |
| Crystal system, space group | triclinic, P-1                                                                                                                        |
| Unit cell dimensions        | a = 8.5856(3) Å    alpha = 66.612(7) deg.<br>b = 13.3808(10) Å    beta = 77.281(4) deg.<br>c = 13.8389(9) Å    gamma = 77.711(5) deg. |
| Volume                      | 1409.37(15) Å <sup>3</sup>                                                                                                            |
| Z, Calculated density       | 2, 1.248 Mg/m <sup>3</sup>                                                                                                            |
| Absorption coefficient      | 0.146 mm <sup>-1</sup>                                                                                                                |

|                                   |                                             |
|-----------------------------------|---------------------------------------------|
| F(000)                            | 560                                         |
| Crystal size                      | 0.37 x 0.12 x 0.06 mm                       |
| Theta range for data collection   | 2.67 to 25.00 deg.                          |
| Limiting indices                  | -6<=h<=10, -15<=k<=15, -16<=l<=16           |
| Reflections collected / unique    | 23380 / 4939 [R(int) = 0.0973]              |
| Completeness to theta = 25.00     | 99.3 %                                      |
| Max. and min. transmission        | 0.9913 and 0.9480                           |
| Refinement method                 | Full-matrix least-squares on F <sup>2</sup> |
| Data / restraints / parameters    | 4939 / 0 / 354                              |
| Goodness-of-fit on F <sup>2</sup> | 0.805                                       |
| Final R indices [I>2sigma(I)]     | R1 = 0.0419, wR2 = 0.0365                   |
| R indices (all data)              | R1 = 0.1598, wR2 = 0.0424                   |
| Largest diff. peak and hole       | 0.130 and -0.146 e.A <sup>-3</sup>          |

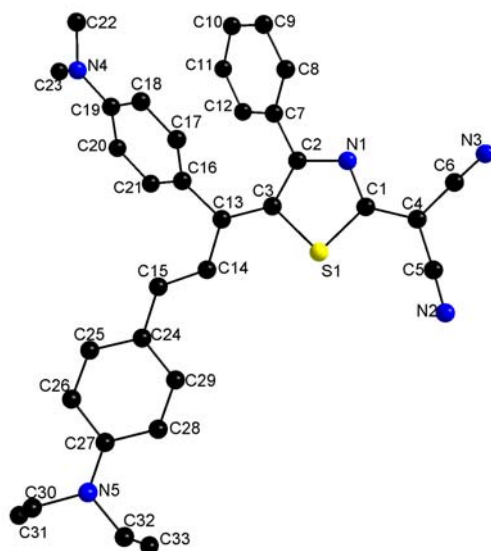

**Figure S26:** Molecular structure of compound **5a**.

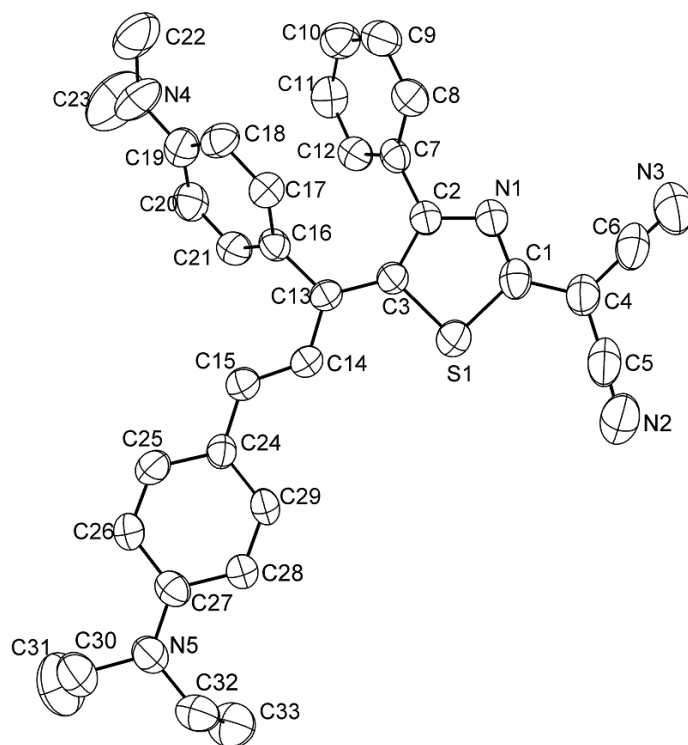

**Figure S27:** ORTEP view of **5a**

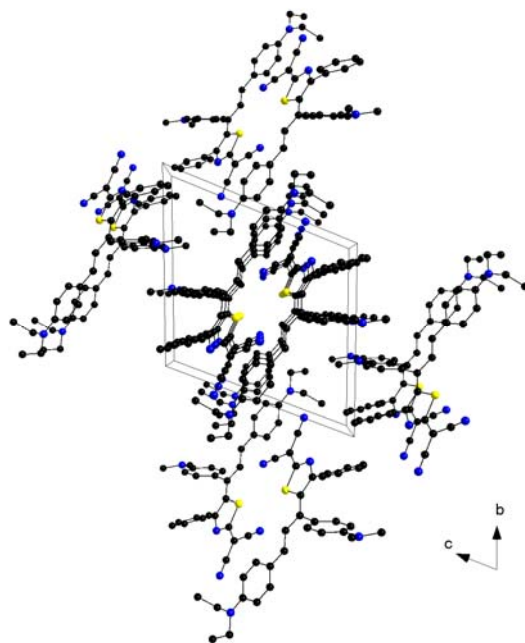

**Figure S28:** Crystal packing of **5a** viewed along the [100] direction.

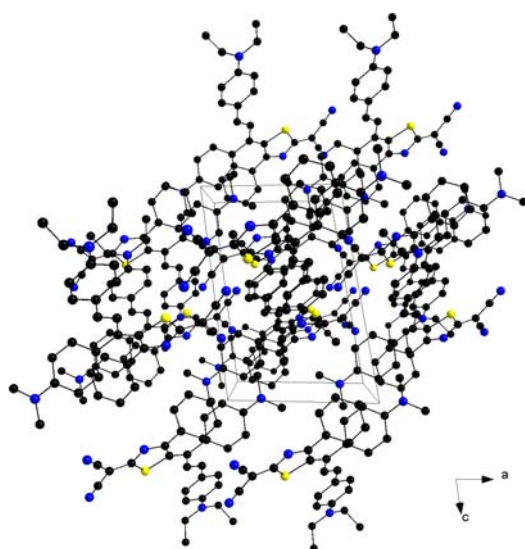

**Figure S29:** Crystal packing of **5a** viewed along the [010] direction.



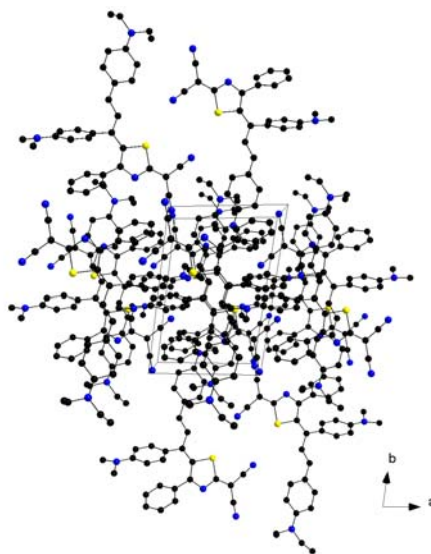

**Figure S30:** Crystal packing of **5a** viewed along the [001] direction.

### Crystal data for 7c:

Single crystals were obtained by slow diffusion of hexane into a concentrated solution of the chromophore in  $\text{CHCl}_3$  at room temperature:  $\text{C}_{37}\text{H}_{38}\text{N}_4\text{O}$ ,  $M_r = 554.71$ , crystal dimensions  $0.29 \times 0.24 \times 0.04$  mm, monoclinic space group  $P2_1/c$  (no. 14),  $\rho_{\text{calcd}} = 1.170 \text{ g cm}^{-3}$ ,  $Z = 4$ ,  $a = 9.8471(5)$ ,  $b = 28.4321(15)$ ,  $c = 11.7509(8) \text{ \AA}$ ,  $\beta = 106.763(6)$ ,  $V = 3150.1(3) \text{ \AA}^3$  at  $150(1) \text{ K}$ . Number of measured and unique reflections 24720 and 7462, respectively ( $R_{\text{int}} = 0.0914$ ). Final  $R(F) = 0.0685$ ,  $wR(F^2) = 0.0916$  for 387 parameters and 3573 reflections with  $I > 4\sigma(I)$  (corresponding R-values based on all 7462 reflections 0.1690 and 0.1209).

### Crystal data and structure refinement for 7c.

|                             |                                                                                                                                                                         |
|-----------------------------|-------------------------------------------------------------------------------------------------------------------------------------------------------------------------|
| Identification code         | 7c                                                                                                                                                                      |
| Empirical formula           | C <sub>37</sub> H <sub>38</sub> N <sub>4</sub> O                                                                                                                        |
| Formula weight              | 554.71                                                                                                                                                                  |
| Temperature                 | 150(1) K                                                                                                                                                                |
| Wavelength                  | 0.71073 Å                                                                                                                                                               |
| Crystal system, space group | Monoclinic, $P2_1/c$                                                                                                                                                    |
| Unit cell dimensions        | $a = 9.8471(5) \text{ \AA}$ $\alpha = 90 \text{ deg.}$<br>$b = 28.4321(15) \text{ \AA}$ $\beta = 106.763(6)$<br>$c = 11.7509(8) \text{ \AA}$ $\gamma = 90 \text{ deg.}$ |
| Volume                      | $3150.1(3) \text{ \AA}^3$                                                                                                                                               |
| Z, Calculated density       | 4, $1.170 \text{ Mg/m}^3$                                                                                                                                               |
| Absorption coefficient      | $0.071 \text{ mm}^{-1}$                                                                                                                                                 |
| $F(000)$                    | 1184                                                                                                                                                                    |

|                                   |                                             |
|-----------------------------------|---------------------------------------------|
| Crystal size                      | 0.29 x 0.24 x 0.04 mm                       |
| Theta range for data collection   | 3.05 to 28.87 deg.                          |
| Limiting indices                  | -12<=h<=12, -38<=k<=36, -15<=l<=15          |
| Reflections collected / unique    | 24720 / 7462 [R(int) = 0.0914]              |
| Completeness to theta = 27.50     | 98.2 %                                      |
| Absorption correction             | Semi-empirical from equivalents             |
| Max. and min. transmission        | 0.9972 and 0.9797                           |
| Refinement method                 | Full-matrix least-squares on F <sup>2</sup> |
| Data / restraints / parameters    | 7462 / 0 / 387                              |
| Goodness-of-fit on F <sup>2</sup> | 0.984                                       |
| Final R indices [I>2sigma(I)]     | R1 = 0.0685, wR2 = 0.0916                   |
| R indices (all data)              | R1 = 0.1690, wR2 = 0.1209                   |
| Largest diff. peak and hole       | 0.218 and -0.221 e.A <sup>-3</sup>          |

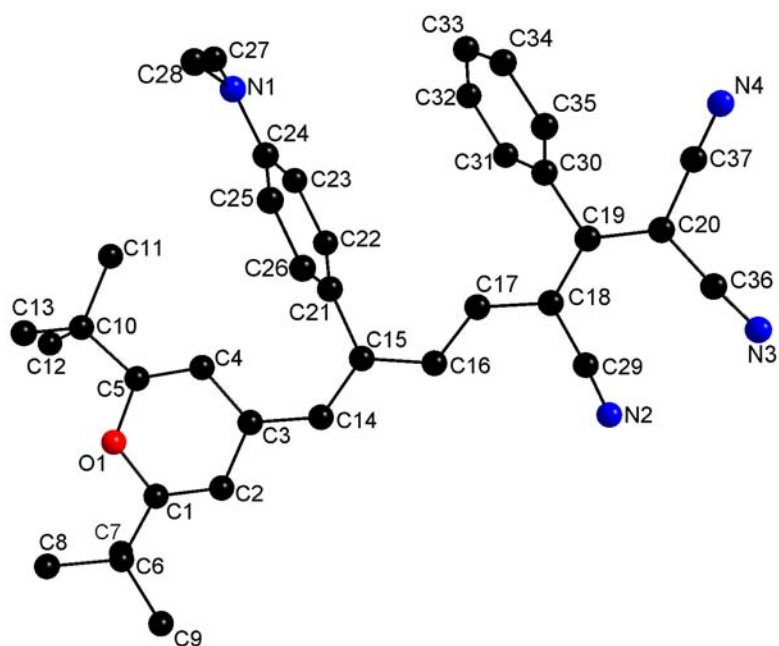

**Figure S31:** Molecular structure of compound **7c**.

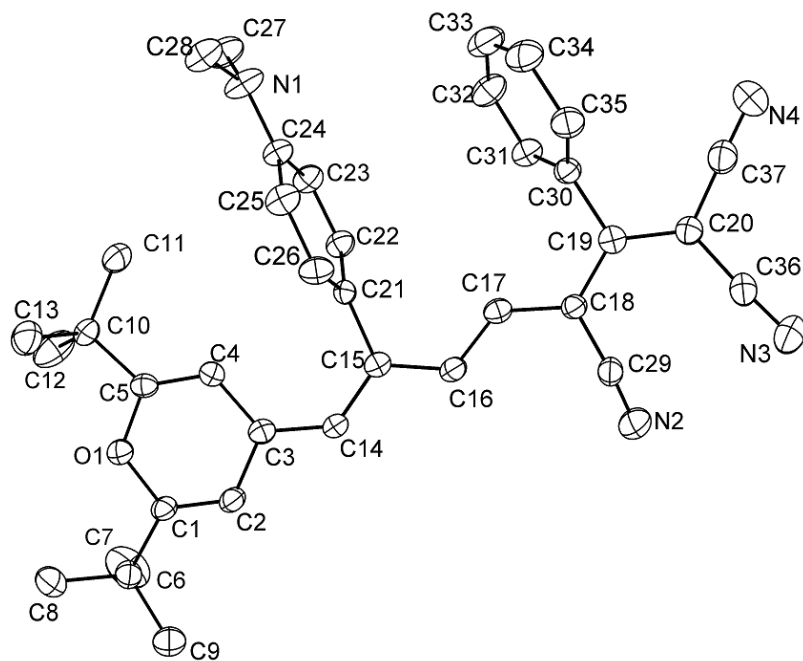

**Figure S32:** ORTEP view of **7c**.

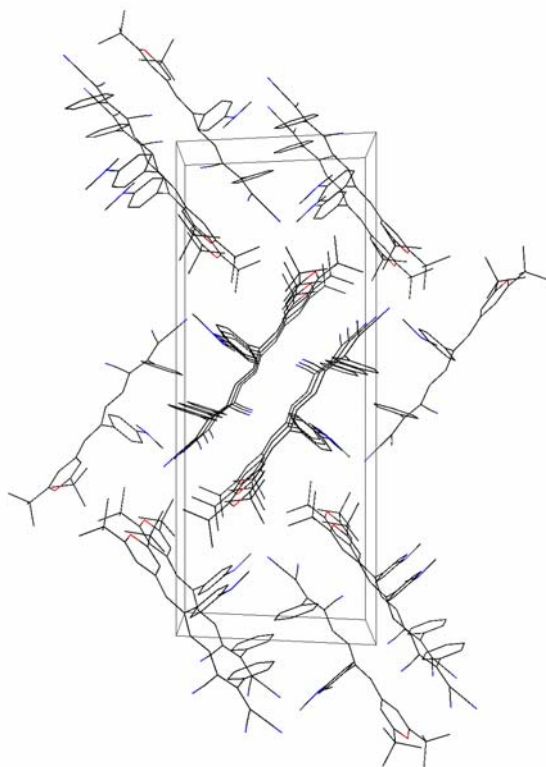

**Figure S33:** Crystal packing of **7c** viewed along the [100] direction.

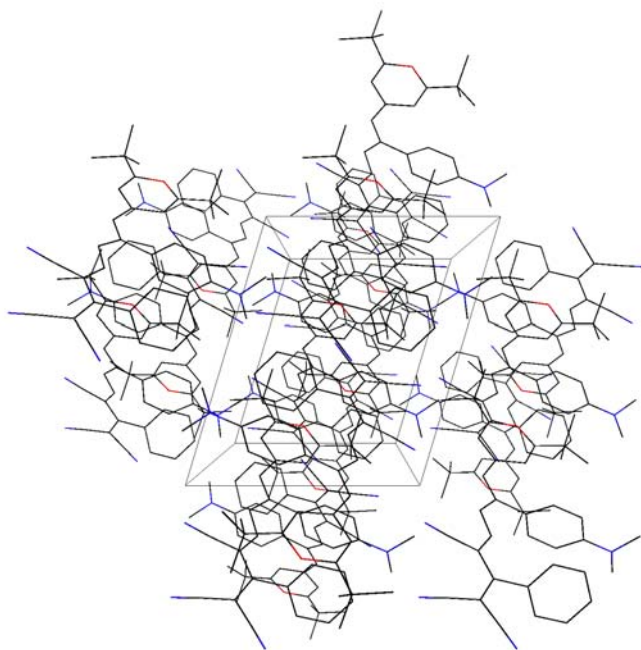

**Figure S34:** Crystal packing of **7c** viewed along the [010] direction.

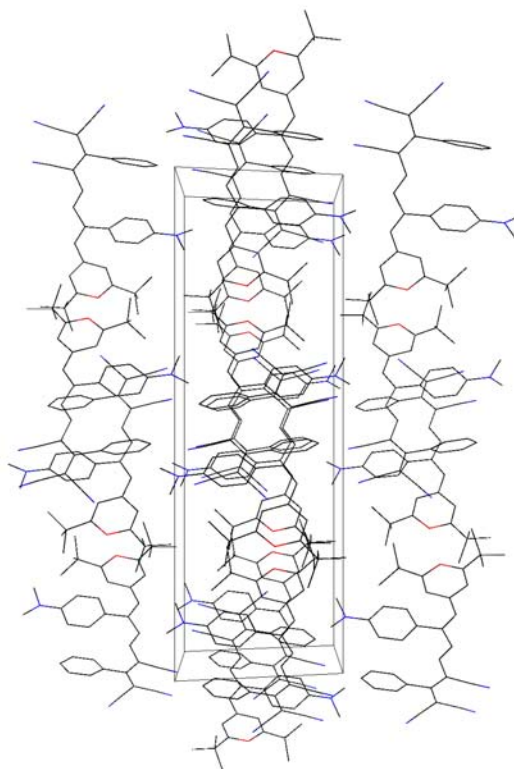

**Figure S35:** Crystal packing of **7c** viewed along the [001] direction.

Crystal data for 10:

Single crystals were obtained by slow diffusion of hexane into a concentrated solution of the chromophore in CH<sub>2</sub>Cl<sub>2</sub> at room temperature: C<sub>36</sub>H<sub>37</sub>N<sub>3</sub>O, M<sub>r</sub> = 527.69, crystal dimensions 0.34 x 0.05 x 0.04 mm, triclinic space group P-1 (no. 2),  $\rho_{\text{calcd}} = 1.152 \text{ g cm}^{-3}$ , Z = 2, a = 5.9702(5), b = 12.9502(14), c = 20.426(2) Å,  $\alpha = 104.108(9)$ ,  $\beta = 92.797(8)$ ,  $\gamma = 95.045(8)$ , V = 1521.6(3) Å<sup>3</sup> at 150(1) K. Number of measured and unique reflections 9971 and 5343, respectively ( $R_{\text{int}}=0.0851$ ). Final  $R(F)=0.0804$ ,  $wR(F^2)=0.0971$  for 361 parameters and 2142 reflections with  $I > 4\sigma(I)$  (corresponding R-values based on all 5343 reflections 0.0804 and 0.1405).

Crystal data and structure refinement for 10.

|                             |                                                                                                                                       |
|-----------------------------|---------------------------------------------------------------------------------------------------------------------------------------|
| Identification code         | 10                                                                                                                                    |
| Empirical formula           | C36 H37 N3 O                                                                                                                          |
| Formula weight              | 527.69                                                                                                                                |
| Temperature                 | 150(2) K                                                                                                                              |
| Wavelength                  | 0.71073 Å                                                                                                                             |
| Crystal system, space group | Triclinic, P-1                                                                                                                        |
| Unit cell dimensions        | a = 5.9702(5) Å    alpha = 104.108(9) deg.<br>b = 12.9502(14) Å    beta = 92.797(8) deg.<br>c = 20.426(2) Å    gamma = 95.045(8) deg. |
| Volume                      | 1521.6(3) Å <sup>3</sup>                                                                                                              |
| Z, Calculated density       | 2, 1.152 Mg/m <sup>3</sup>                                                                                                            |
| Absorption coefficient      | 0.069 mm <sup>-1</sup>                                                                                                                |
| F(000)                      | 564                                                                                                                                   |

|                                   |                                             |
|-----------------------------------|---------------------------------------------|
| Crystal size                      | 0.34 x 0.05 x 0.04 mm                       |
| Theta range for data collection   | 2.93 to 25.00 deg.                          |
| Limiting indices                  | -7<=h<=7, -15<=k<=11, -23<=l<=24            |
| Reflections collected / unique    | 9971 / 5343 [R(int) = 0.0851]               |
| Completeness to theta = 25.00     | 99.9 %                                      |
| Absorption correction             | Semi-empirical from equivalents             |
| Max. and min. transmission        | 0.9972 and 0.9768                           |
| Refinement method                 | Full-matrix least-squares on F <sup>2</sup> |
| Data / restraints / parameters    | 5343 / 0 / 361                              |
| Goodness-of-fit on F <sup>2</sup> | 0.968                                       |
| Final R indices [I>2sigma(I)]     | R1 = 0.0804, wR2 = 0.0971                   |
| R indices (all data)              | R1 = 0.2233, wR2 = 0.1405                   |
| Largest diff. peak and hole       | 0.194 and -0.207 e.A <sup>-3</sup>          |



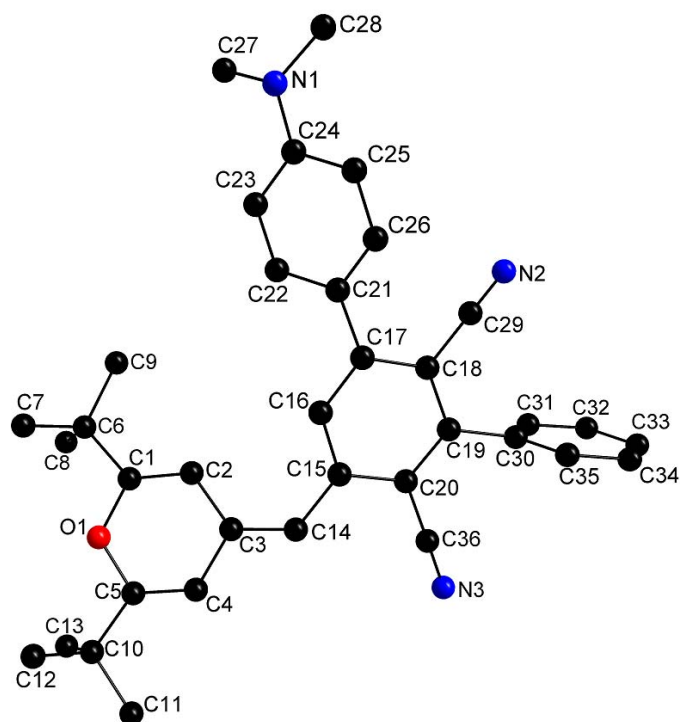

**Figure S36:** Molecular structure of compound **10**.

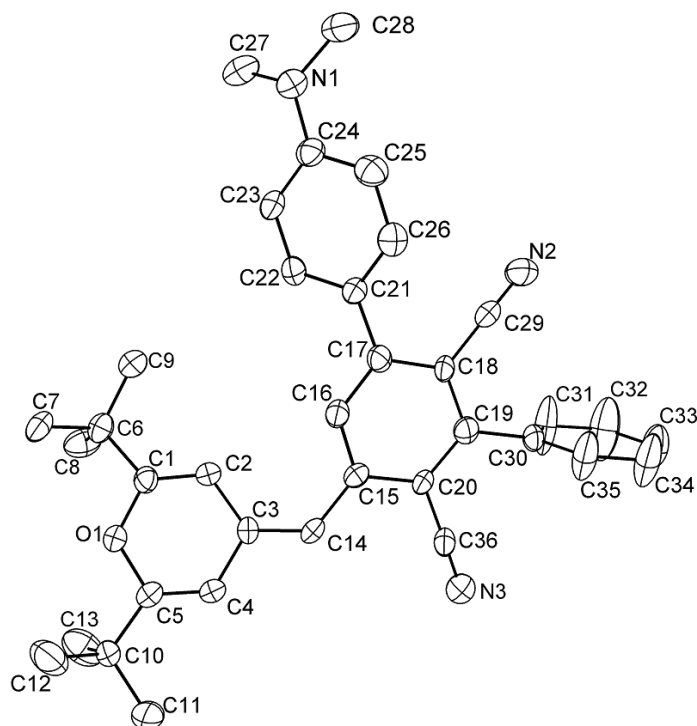

**Figure S37:** ORTEP view of **10**.

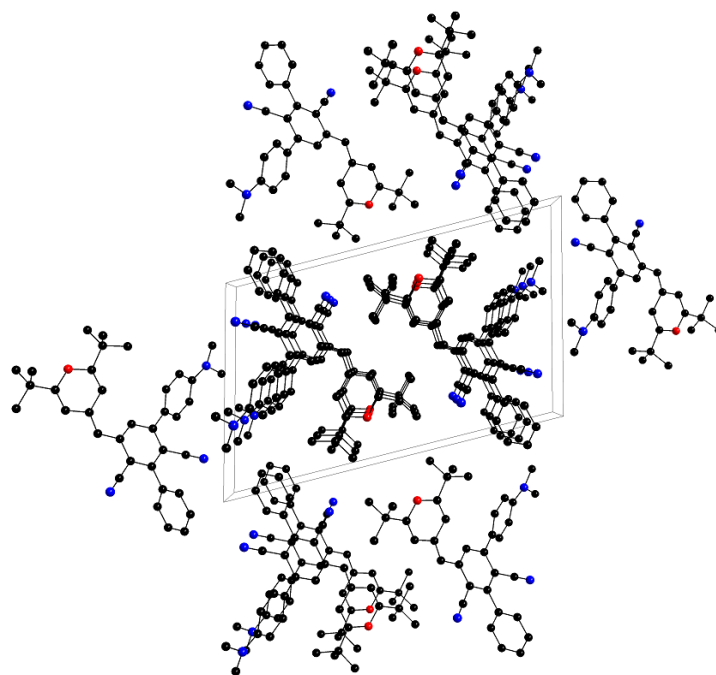

**Figure S38:** Crystal packing of **10** viewed along the [100] direction.

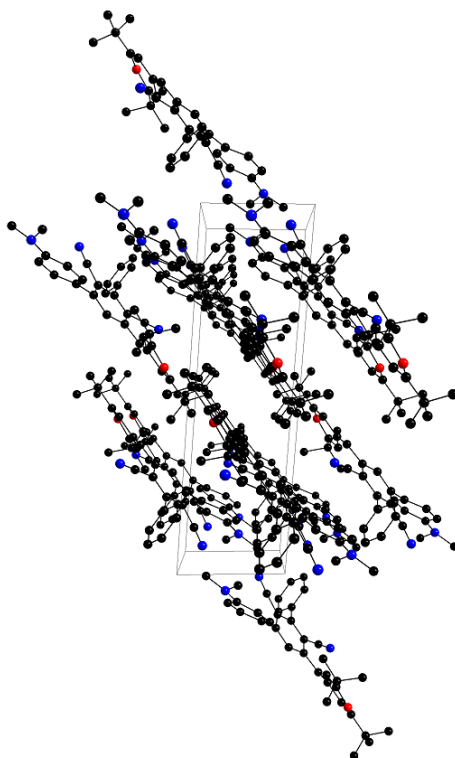

**Figure S39:** Crystal packing of **10** viewed along the [010] direction.

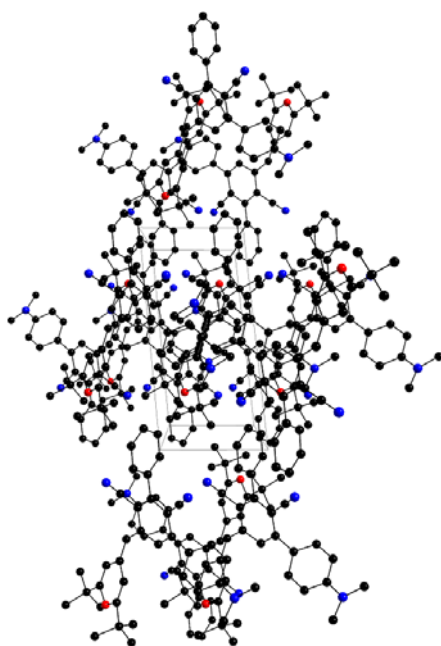

**Figure S40:** Crystal packing of **10** viewed along the [001] direction.

## 5. UV-vis spectra

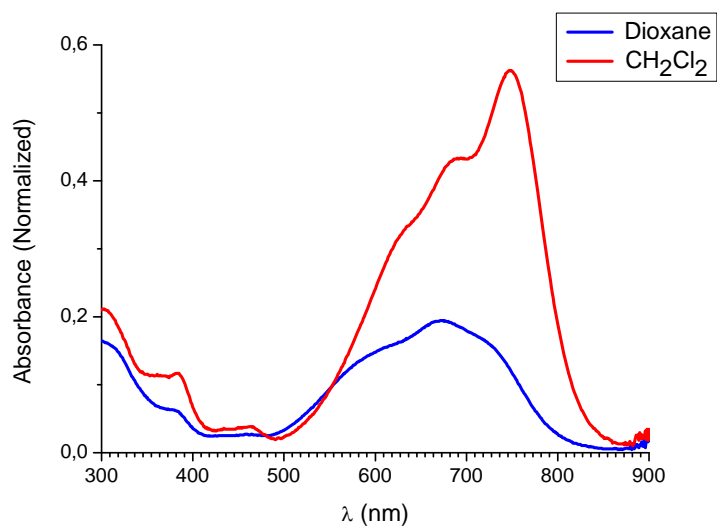

**Figure S41:** Normalized UV-vis absorption of compound **5a** ( $10^{-5}$  M) in dioxane and in  $\text{CH}_2\text{Cl}_2$ .

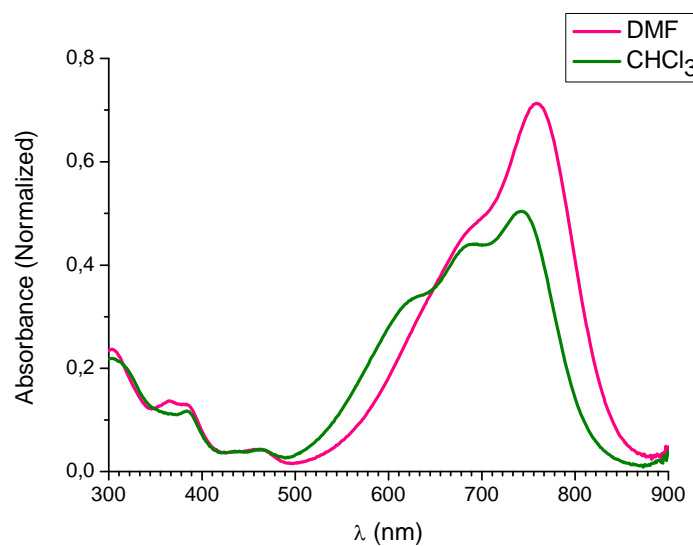

**Figure S42:** Normalized UV-vis absorption of compound **5a** ( $10^{-5}$  M) in DMF and in  $\text{CHCl}_3$ .

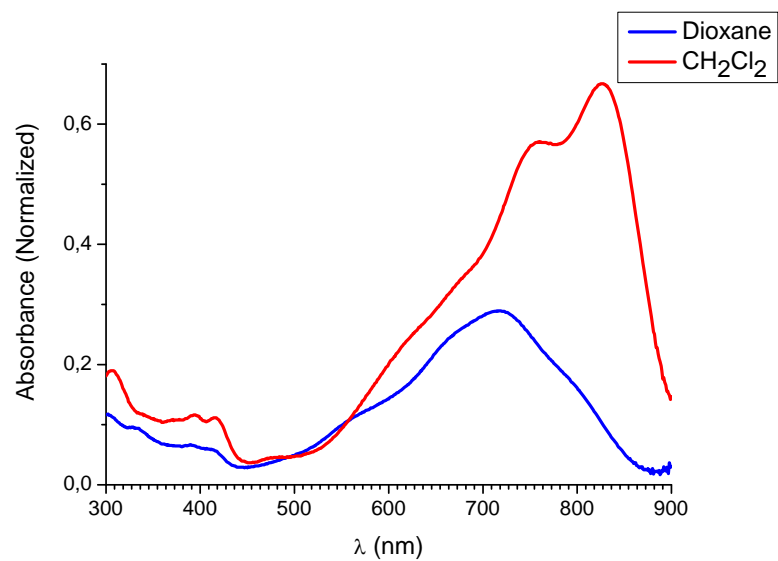

**Figure S43:** Normalized UV-vis absorption of compound **6a** ( $10^{-5}$  M) in dioxane and in  $\text{CH}_2\text{Cl}_2$ .

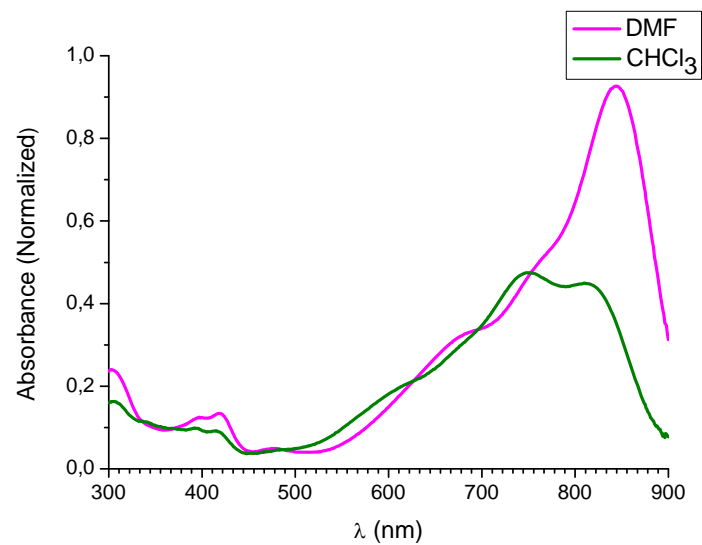

**Figure S44:** Normalized UV-vis absorption of compound **6a** ( $10^{-5}$  M) in DMF and in  $\text{CHCl}_3$ .

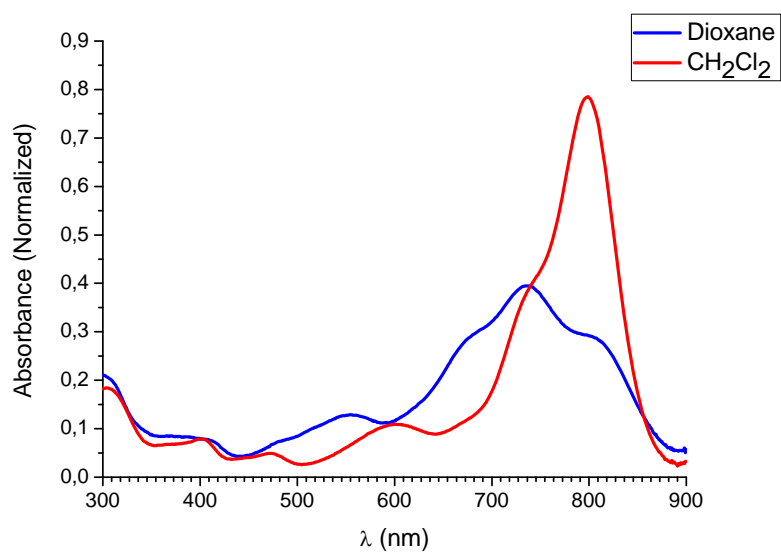

**Figure S45:** Normalized UV-vis absorption of compound **7a** (10<sup>-5</sup> M) in dioxane and in CH<sub>2</sub>Cl<sub>2</sub>.

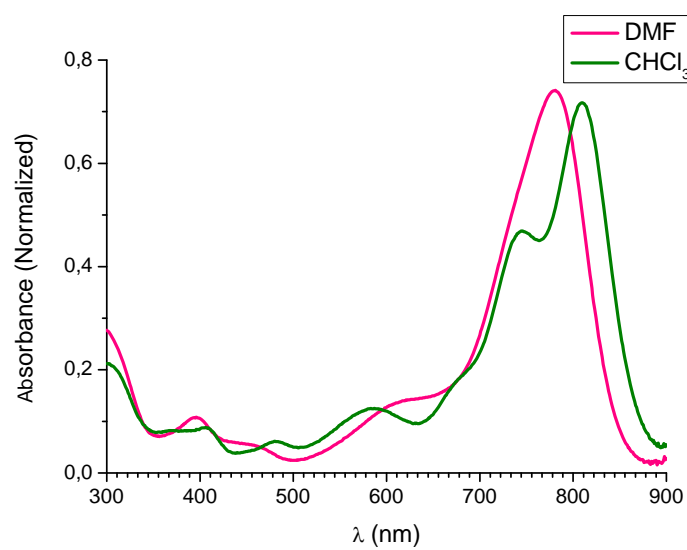

**Figure S46:** Normalized UV-vis absorption of compound **7a** (10<sup>-5</sup> M) in DMF and in CHCl<sub>3</sub>.

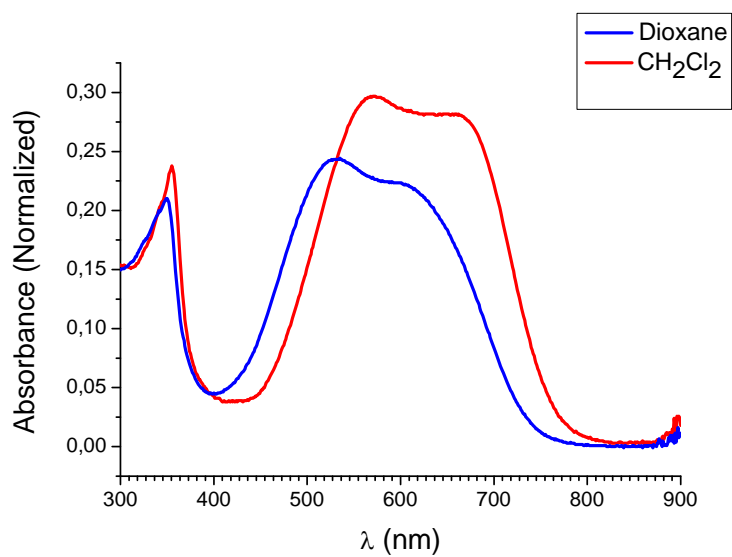

**Figure S47:** Normalized UV-vis absorption of compound **5b** ( $10^{-5}$  M) in dioxane and in  $\text{CH}_2\text{Cl}_2$ .

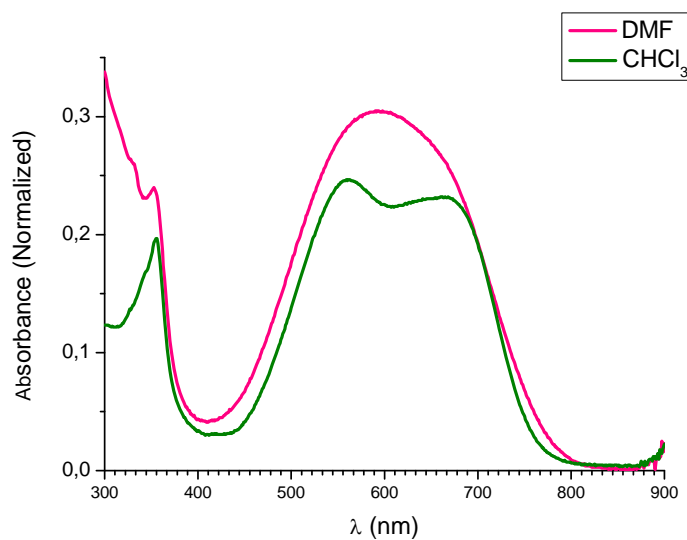

**Figure S48:** Normalized UV-vis absorption of compound **5b** ( $10^{-5}$  M) in DMF and in  $\text{CHCl}_3$ .

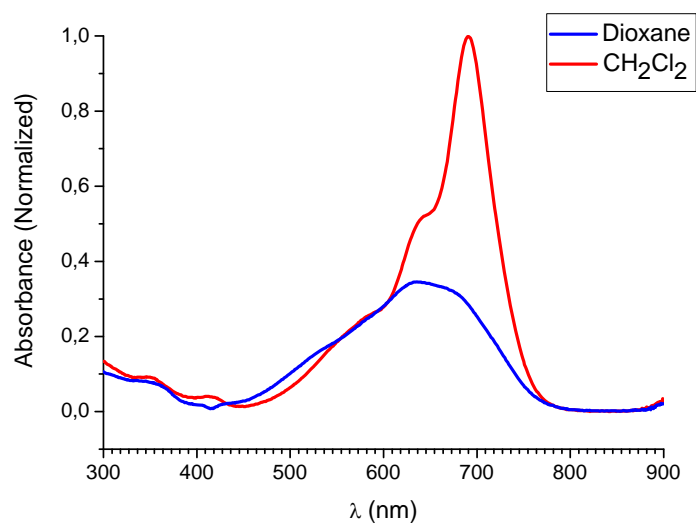

**Figure S49:** Normalized UV-vis absorption of compound **7c** ( $10^{-5}$  M) in dioxane and in CH<sub>2</sub>Cl<sub>2</sub>.

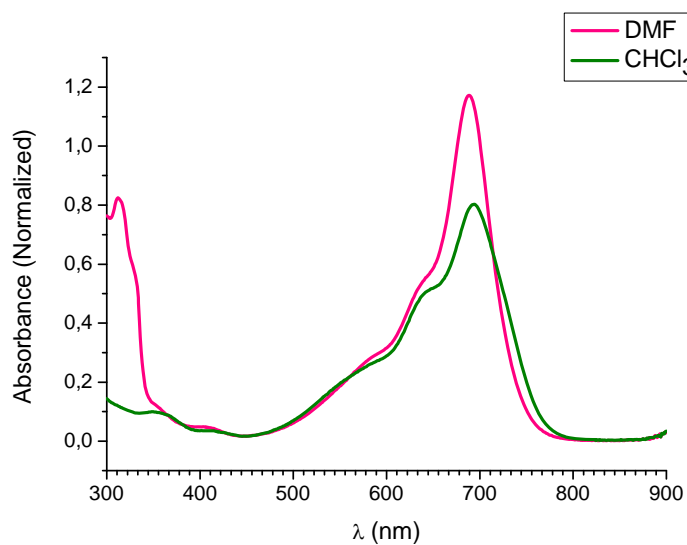

**Figure S50:** Normalized UV-vis absorption of compound **7c** ( $10^{-5}$  M) in DMF and in CHCl<sub>3</sub>.



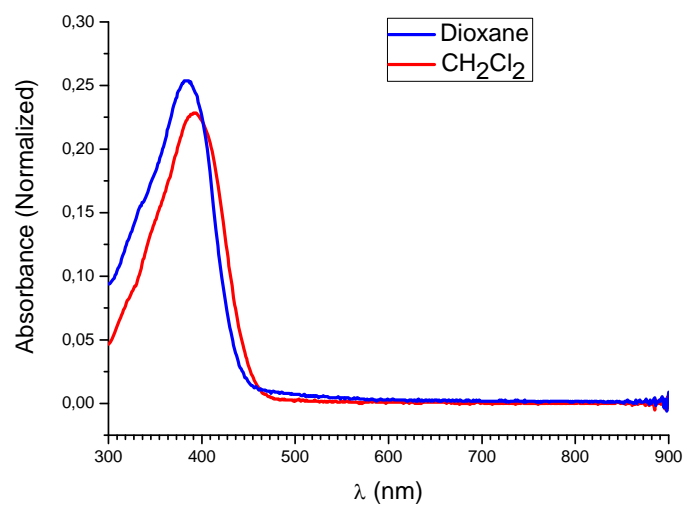

**Figure S51:** Normalized UV-vis absorption of compound **9** ( $10^{-5}$  M) in dioxane and in  $\text{CH}_2\text{Cl}_2$ .

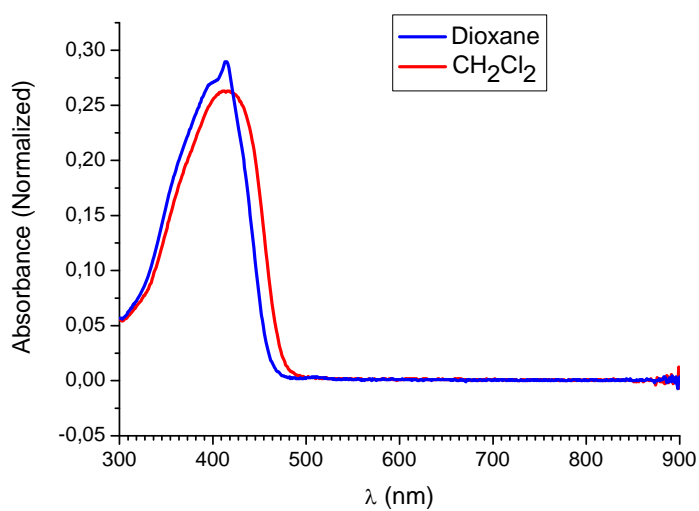

**Figure S52:** Normalized UV-vis absorption of compound **10** ( $10^{-5}$  M) in dioxane and in  $\text{CH}_2\text{Cl}_2$ .

## 6. Theoretical calculations

Cartesian coordinates and energies of optimized geometries used in theoretical calculations (PCM (CH<sub>2</sub>Cl<sub>2</sub>)-B3P86/6-31G\*)

### 5a

Standard orientation:

| Center<br>Number | Atomic<br>Number | Atomic<br>Type | Coordinates (Angstroms) |           |           |
|------------------|------------------|----------------|-------------------------|-----------|-----------|
|                  |                  |                | X                       | Y         | Z         |
| 1                | 6                | 0              | 1.625079                | 1.174890  | 0.029025  |
| 2                | 6                | 0              | 3.010345                | 1.260550  | 0.327005  |
| 3                | 16               | 0              | 1.070279                | 2.784891  | -0.442226 |
| 4                | 6                | 0              | 2.711832                | 3.379263  | -0.285735 |
| 5                | 6                | 0              | 3.061411                | 4.710617  | -0.571368 |
| 6                | 7                | 0              | 3.584427                | 2.456012  | 0.131027  |
| 7                | 6                | 0              | 4.403100                | 5.135703  | -0.456208 |
| 8                | 7                | 0              | 5.506529                | 5.506810  | -0.367747 |
| 9                | 6                | 0              | 2.087583                | 5.643722  | -0.981422 |
| 10               | 7                | 0              | 1.263661                | 6.400718  | -1.318742 |
| 11               | 6                | 0              | 3.855883                | 0.215604  | 0.936461  |
| 12               | 6                | 0              | 5.198488                | 0.117218  | 0.549267  |
| 13               | 6                | 0              | 3.377808                | -0.618084 | 1.954814  |
| 14               | 6                | 0              | 6.036012                | -0.820251 | 1.143423  |
| 15               | 1                | 0              | 5.574312                | 0.782485  | -0.221395 |
| 16               | 6                | 0              | 4.220083                | -1.547806 | 2.554069  |
| 17               | 1                | 0              | 2.350090                | -0.522744 | 2.289453  |
| 18               | 6                | 0              | 5.549031                | -1.656958 | 2.146298  |
| 19               | 1                | 0              | 7.072516                | -0.893290 | 0.826969  |
| 20               | 1                | 0              | 3.839818                | -2.182383 | 3.349286  |
| 21               | 1                | 0              | 6.204703                | -2.385043 | 2.615301  |
| 22               | 6                | 0              | 0.722394                | 0.084733  | 0.005954  |
| 23               | 6                | 0              | -3.082892               | -0.288862 | -0.102059 |
| 24               | 6                | 0              | -3.661919               | 0.789180  | 0.608017  |
| 25               | 6                | 0              | -3.977956               | -1.210307 | -0.691266 |
| 26               | 6                | 0              | -5.023397               | 0.940349  | 0.715001  |
| 27               | 1                | 0              | -3.024940               | 1.527272  | 1.086245  |
| 28               | 6                | 0              | -5.343756               | -1.075196 | -0.594959 |
| 29               | 1                | 0              | -3.572505               | -2.058925 | -1.237031 |
| 30               | 6                | 0              | -5.921938               | 0.012889  | 0.113606  |
| 31               | 1                | 0              | -5.406633               | 1.796780  | 1.255895  |
| 32               | 1                | 0              | -5.973854               | -1.826915 | -1.054054 |
| 33               | 7                | 0              | -7.268766               | 0.162333  | 0.215702  |

|    |   |   |           |           |           |
|----|---|---|-----------|-----------|-----------|
| 34 | 6 | 0 | -7.874792 | 1.209146  | 1.031896  |
| 35 | 1 | 0 | -8.841552 | 0.826916  | 1.374711  |
| 36 | 1 | 0 | -7.274678 | 1.358914  | 1.933759  |
| 37 | 6 | 0 | -8.198655 | -0.710979 | -0.492546 |
| 38 | 1 | 0 | -7.781308 | -0.965528 | -1.470975 |
| 39 | 1 | 0 | -9.099713 | -0.122862 | -0.693435 |
| 40 | 6 | 0 | -1.677583 | -0.488610 | -0.250783 |
| 41 | 6 | 0 | -0.670194 | 0.350652  | 0.158788  |
| 42 | 1 | 0 | -1.389644 | -1.396752 | -0.777660 |
| 43 | 1 | 0 | -0.935237 | 1.312891  | 0.591881  |
| 44 | 6 | 0 | -8.562255 | -1.967870 | 0.290550  |
| 45 | 1 | 0 | -9.281758 | -2.569069 | -0.274578 |
| 46 | 1 | 0 | -7.679507 | -2.583837 | 0.487001  |
| 47 | 1 | 0 | -9.016600 | -1.710233 | 1.252792  |
| 48 | 6 | 0 | -8.070255 | 2.521906  | 0.281251  |
| 49 | 1 | 0 | -8.554065 | 3.258877  | 0.930269  |
| 50 | 1 | 0 | -7.114090 | 2.934958  | -0.054282 |
| 51 | 1 | 0 | -8.704113 | 2.376935  | -0.599560 |
| 52 | 6 | 0 | 1.202962  | -1.267358 | -0.235792 |
| 53 | 6 | 0 | 2.238658  | -1.518288 | -1.158299 |
| 54 | 6 | 0 | 0.655049  | -2.382154 | 0.431057  |
| 55 | 6 | 0 | 2.694563  | -2.793576 | -1.411439 |
| 56 | 1 | 0 | 2.664264  | -0.687528 | -1.712913 |
| 57 | 6 | 0 | 1.116368  | -3.662940 | 0.208733  |
| 58 | 1 | 0 | -0.116478 | -2.225446 | 1.179063  |
| 59 | 6 | 0 | 2.151242  | -3.912180 | -0.728490 |
| 60 | 1 | 0 | 3.470690  | -2.932702 | -2.154117 |
| 61 | 1 | 0 | 0.685672  | -4.479364 | 0.775763  |
| 62 | 7 | 0 | 2.604055  | -5.173672 | -0.964624 |
| 63 | 6 | 0 | 3.699121  | -5.395224 | -1.889311 |
| 64 | 1 | 0 | 4.601224  | -4.852268 | -1.582082 |
| 65 | 1 | 0 | 3.437635  | -5.082078 | -2.907918 |
| 66 | 6 | 0 | 2.014048  | -6.302061 | -0.271178 |
| 67 | 1 | 0 | 0.936319  | -6.370095 | -0.462424 |
| 68 | 1 | 0 | 2.168623  | -6.238812 | 0.813682  |
| 69 | 1 | 0 | 2.478395  | -7.221572 | -0.626341 |
| 70 | 1 | 0 | 3.935813  | -6.458547 | -1.913164 |

-----  
E(RB3P86) = -1953.15647132 A.U.

6a

Standard orientation:

| Center<br>Number | Atomic<br>Number | Atomic<br>Type | Coordinates (Angstroms) |           |           |
|------------------|------------------|----------------|-------------------------|-----------|-----------|
|                  |                  |                | X                       | Y         | Z         |
| 1                | 6                | 0              | -3.174070               | -1.196665 | 0.153822  |
| 2                | 6                | 0              | -4.546351               | -0.875213 | 0.333743  |
| 3                | 16               | 0              | -3.051602               | -2.910670 | -0.230184 |
| 4                | 6                | 0              | -4.807117               | -3.020711 | -0.170023 |
| 5                | 6                | 0              | -5.488886               | -4.223225 | -0.410888 |
| 6                | 7                | 0              | -5.418366               | -1.869350 | 0.134488  |
| 7                | 6                | 0              | -6.899839               | -4.267651 | -0.351289 |
| 8                | 7                | 0              | -8.064759               | -4.325937 | -0.307842 |
| 9                | 6                | 0              | -4.787034               | -5.407281 | -0.718386 |
| 10               | 7                | 0              | -4.186723               | -6.377268 | -0.970623 |
| 11               | 6                | 0              | -5.063925               | 0.450659  | 0.702704  |
| 12               | 6                | 0              | -6.266072               | 0.893459  | 0.130181  |
| 13               | 6                | 0              | -4.416415               | 1.267123  | 1.641339  |
| 14               | 6                | 0              | -6.786919               | 2.137559  | 0.461984  |
| 15               | 1                | 0              | -6.777127               | 0.251396  | -0.579926 |
| 16               | 6                | 0              | -4.945671               | 2.509990  | 1.975664  |
| 17               | 1                | 0              | -3.521977               | 0.911665  | 2.142982  |
| 18               | 6                | 0              | -6.126057               | 2.951712  | 1.382389  |
| 19               | 1                | 0              | -7.712499               | 2.473151  | 0.003506  |
| 20               | 1                | 0              | -4.439800               | 3.128001  | 2.711486  |
| 21               | 1                | 0              | -6.537181               | 3.922287  | 1.644419  |
| 22               | 6                | 0              | 0.334461                | 0.202569  | -0.036666 |
| 23               | 6                | 0              | 4.144892                | -0.187780 | -0.079903 |
| 24               | 6                | 0              | 4.472109                | -1.466299 | 0.427757  |
| 25               | 6                | 0              | 5.226448                | 0.621475  | -0.492854 |
| 26               | 6                | 0              | 5.772680                | -1.904660 | 0.511054  |
| 27               | 1                | 0              | 3.683786                | -2.133743 | 0.762997  |
| 28               | 6                | 0              | 6.535005                | 0.200626  | -0.415199 |
| 29               | 1                | 0              | 5.018736                | 1.615891  | -0.881002 |
| 30               | 6                | 0              | 6.859571                | -1.085975 | 0.092033  |
| 31               | 1                | 0              | 5.957507                | -2.901821 | 0.891474  |
| 32               | 1                | 0              | 7.317903                | 0.879754  | -0.729661 |
| 33               | 7                | 0              | 8.147253                | -1.517038 | 0.176672  |
| 34               | 6                | 0              | 8.500865                | -2.785100 | 0.804981  |
| 35               | 1                | 0              | 9.507542                | -2.667544 | 1.218733  |
| 36               | 1                | 0              | 7.843432                | -2.960919 | 1.661239  |
| 37               | 6                | 0              | 9.259234                | -0.732307 | -0.347687 |
| 38               | 1                | 0              | 8.947564                | -0.235589 | -1.271054 |
| 39               | 1                | 0              | 10.042954               | -1.439622 | -0.637203 |
| 40               | 6                | 0              | 2.811684                | 0.317086  | -0.191042 |
| 41               | 6                | 0              | 1.644720                | -0.347941 | 0.084959  |

|    |   |   |           |           |           |
|----|---|---|-----------|-----------|-----------|
| 42 | 1 | 0 | 2.732189  | 1.338457  | -0.559236 |
| 43 | 1 | 0 | 1.691502  | -1.395715 | 0.374798  |
| 44 | 6 | 0 | 9.812812  | 0.275287  | 0.654471  |
| 45 | 1 | 0 | 10.657339 | 0.817736  | 0.217383  |
| 46 | 1 | 0 | 9.050777  | 1.003781  | 0.947536  |
| 47 | 1 | 0 | 10.164990 | -0.229056 | 1.560210  |
| 48 | 6 | 0 | 8.469422  | -3.966952 | -0.158140 |
| 49 | 1 | 0 | 8.771461  | -4.883370 | 0.359089  |
| 50 | 1 | 0 | 7.466539  | -4.119193 | -0.568750 |
| 51 | 1 | 0 | 9.156999  | -3.806521 | -0.994880 |
| 52 | 6 | 0 | 0.129683  | 1.642676  | -0.214233 |
| 53 | 6 | 0 | -0.750406 | 2.145840  | -1.190979 |
| 54 | 6 | 0 | 0.801729  | 2.587198  | 0.584403  |
| 55 | 6 | 0 | -0.944798 | 3.502280  | -1.371287 |
| 56 | 1 | 0 | -1.260996 | 1.452221  | -1.852935 |
| 57 | 6 | 0 | 0.599976  | 3.946013  | 0.434887  |
| 58 | 1 | 0 | 1.467535  | 2.239980  | 1.369249  |
| 59 | 6 | 0 | -0.278941 | 4.449222  | -0.555713 |
| 60 | 1 | 0 | -1.612942 | 3.832089  | -2.157905 |
| 61 | 1 | 0 | 1.121759  | 4.625708  | 1.098093  |
| 62 | 7 | 0 | -0.474226 | 5.790083  | -0.717883 |
| 63 | 6 | 0 | -1.393490 | 6.273424  | -1.727791 |
| 64 | 1 | 0 | -2.413068 | 5.905104  | -1.556524 |
| 65 | 1 | 0 | -1.084196 | 5.970035  | -2.736396 |
| 66 | 6 | 0 | 0.229851  | 6.734661  | 0.124838  |
| 67 | 1 | 0 | 1.318014  | 6.642549  | 0.014905  |
| 68 | 1 | 0 | -0.020355 | 6.597862  | 1.184925  |
| 69 | 1 | 0 | -0.053609 | 7.747713  | -0.160034 |
| 70 | 1 | 0 | -1.417884 | 7.362504  | -1.696731 |
| 71 | 6 | 0 | -0.749407 | -0.690189 | 0.020093  |
| 72 | 6 | 0 | -2.085972 | -0.326574 | 0.147059  |
| 73 | 1 | 0 | -0.505736 | -1.751865 | 0.019529  |
| 74 | 1 | 0 | -2.320413 | 0.728358  | 0.261258  |

-----  
SCF Done: E(RB3P86) = -2030.82324677 A.U.

## 7a

Standard orientation:

| Center<br>Number | Atomic<br>Number | Atomic<br>Type | Coordinates (Angstroms) |                  |                 |
|------------------|------------------|----------------|-------------------------|------------------|-----------------|
|                  |                  |                | X                       | Y                | Z               |
| 1                | 6                | 0              | <b>-4.758444</b>        | <b>-0.219084</b> | <b>0.574540</b> |
| 2                | 6                | 0              | <b>-3.413464</b>        | <b>-0.225513</b> | <b>0.400057</b> |

|    |    |   |           |           |           |
|----|----|---|-----------|-----------|-----------|
| 3  | 6  | 0 | -2.753392 | -1.324531 | -0.240647 |
| 4  | 6  | 0 | -3.618957 | -2.398569 | -0.632049 |
| 5  | 6  | 0 | -4.961190 | -2.337944 | -0.452146 |
| 6  | 1  | 0 | -2.840719 | 0.609336  | 0.773852  |
| 7  | 1  | 0 | -3.191289 | -3.276688 | -1.099585 |
| 8  | 6  | 0 | 3.461386  | -0.867481 | -0.158343 |
| 9  | 6  | 0 | 4.685239  | -0.159213 | -0.214791 |
| 10 | 16 | 0 | 3.813416  | -2.555945 | 0.194824  |
| 11 | 6  | 0 | 5.525066  | -2.153573 | 0.280272  |
| 12 | 6  | 0 | 6.505850  | -3.121871 | 0.560304  |
| 13 | 7  | 0 | 5.795115  | -0.867082 | 0.044867  |
| 14 | 6  | 0 | 7.869125  | -2.758594 | 0.614615  |
| 15 | 7  | 0 | 9.001419  | -2.477956 | 0.665295  |
| 16 | 6  | 0 | 6.153370  | -4.466375 | 0.793240  |
| 17 | 7  | 0 | 5.839393  | -5.576231 | 0.982262  |
| 18 | 6  | 0 | 4.825728  | 1.274204  | -0.514978 |
| 19 | 6  | 0 | 5.796122  | 2.017953  | 0.173330  |
| 20 | 6  | 0 | 4.051724  | 1.911098  | -1.495417 |
| 21 | 6  | 0 | 5.962462  | 3.372018  | -0.088096 |
| 22 | 1  | 0 | 6.409778  | 1.519097  | 0.916391  |
| 23 | 6  | 0 | 4.226010  | 3.266723  | -1.758779 |
| 24 | 1  | 0 | 3.342579  | 1.336208  | -2.082619 |
| 25 | 6  | 0 | 5.174895  | 4.001998  | -1.052033 |
| 26 | 1  | 0 | 6.710578  | 3.938003  | 0.459316  |
| 27 | 1  | 0 | 3.626703  | 3.744851  | -2.527971 |
| 28 | 1  | 0 | 5.309308  | 5.059733  | -1.259165 |
| 29 | 8  | 0 | -5.522410 | -1.250247 | 0.133108  |
| 30 | 6  | 0 | -1.375366 | -1.468514 | -0.447853 |
| 31 | 6  | 0 | 2.162293  | -0.353869 | -0.237899 |
| 32 | 1  | 0 | -1.073359 | -2.463221 | -0.771673 |
| 33 | 1  | 0 | 2.084736  | 0.726438  | -0.325824 |
| 34 | 6  | 0 | -0.317173 | -0.559994 | -0.242742 |
| 35 | 6  | 0 | 0.992612  | -1.093826 | -0.210623 |
| 36 | 1  | 0 | 1.071106  | -2.180261 | -0.204334 |
| 37 | 6  | 0 | -5.592434 | 0.854064  | 1.233622  |
| 38 | 6  | 0 | -4.710549 | 1.992369  | 1.750144  |
| 39 | 6  | 0 | -6.587398 | 1.409591  | 0.198044  |
| 40 | 6  | 0 | -6.366390 | 0.234153  | 2.410755  |
| 41 | 1  | 0 | -4.002847 | 1.644849  | 2.510191  |
| 42 | 1  | 0 | -4.145769 | 2.469004  | 0.941950  |
| 43 | 1  | 0 | -5.345231 | 2.756130  | 2.210182  |
| 44 | 1  | 0 | -7.244052 | 0.624354  | -0.187005 |
| 45 | 1  | 0 | -7.211450 | 2.176363  | 0.668609  |
| 46 | 1  | 0 | -6.062013 | 1.867104  | -0.646901 |
| 47 | 1  | 0 | -6.984094 | 1.003447  | 2.885648  |
| 48 | 1  | 0 | -7.025340 | -0.572389 | 2.077112  |
| 49 | 1  | 0 | -5.682480 | -0.167967 | 3.165609  |
| 50 | 6  | 0 | -5.994704 | -3.368690 | -0.838734 |

|    |   |   |           |           |           |
|----|---|---|-----------|-----------|-----------|
| 51 | 6 | 0 | -6.747993 | -3.816543 | 0.426937  |
| 52 | 6 | 0 | -6.985527 | -2.728955 | -1.828238 |
| 53 | 6 | 0 | -5.336524 | -4.584094 | -1.494490 |
| 54 | 1 | 0 | -6.067034 | -4.277490 | 1.150086  |
| 55 | 1 | 0 | -7.250283 | -2.974951 | 0.912243  |
| 56 | 1 | 0 | -7.508138 | -4.556071 | 0.154620  |
| 57 | 1 | 0 | -6.477956 | -2.412532 | -2.745599 |
| 58 | 1 | 0 | -7.753634 | -3.461035 | -2.098053 |
| 59 | 1 | 0 | -7.482804 | -1.859237 | -1.389698 |
| 60 | 1 | 0 | -6.111747 | -5.308349 | -1.762870 |
| 61 | 1 | 0 | -4.803069 | -4.312339 | -2.411347 |
| 62 | 1 | 0 | -4.635842 | -5.082319 | -0.816388 |
| 63 | 6 | 0 | -0.529861 | 0.891037  | -0.132132 |
| 64 | 6 | 0 | 0.043392  | 1.655657  | 0.898067  |
| 65 | 6 | 0 | -1.303369 | 1.576015  | -1.084997 |
| 66 | 6 | 0 | -0.151188 | 3.023218  | 0.986213  |
| 67 | 1 | 0 | 0.627872  | 1.158774  | 1.667370  |
| 68 | 6 | 0 | -1.489305 | 2.944504  | -1.026664 |
| 69 | 1 | 0 | -1.750032 | 1.017759  | -1.903252 |
| 70 | 6 | 0 | -0.917129 | 3.714208  | 0.017295  |
| 71 | 1 | 0 | 0.294972  | 3.560518  | 1.814398  |
| 72 | 1 | 0 | -2.071196 | 3.426359  | -1.803486 |
| 73 | 7 | 0 | -1.096963 | 5.066228  | 0.083490  |
| 74 | 6 | 0 | -0.484878 | 5.828541  | 1.152112  |
| 75 | 1 | 0 | -0.848874 | 5.510397  | 2.137806  |
| 76 | 1 | 0 | 0.608501  | 5.732378  | 1.143824  |
| 77 | 1 | 0 | -0.732016 | 6.882501  | 1.025729  |
| 78 | 6 | 0 | -1.888659 | 5.743391  | -0.922391 |
| 79 | 1 | 0 | -1.459747 | 5.623880  | -1.925986 |
| 80 | 1 | 0 | -2.920705 | 5.370039  | -0.945180 |
| 81 | 1 | 0 | -1.920826 | 6.808653  | -0.694469 |

-----  
E(RB3P86) = -2130.85208279 A.U. after 6 cycles

### 7c

Standard orientation:

| Center<br>Number | Atomic<br>Number | Atomic<br>Type | Coordinates (Angstroms) |           |           |
|------------------|------------------|----------------|-------------------------|-----------|-----------|
|                  |                  |                | X                       | Y         | Z         |
| 1                | 6                | 0              | -4.396512               | 0.260922  | -0.519077 |
| 2                | 8                | 0              | -5.328731               | -0.629755 | -0.095481 |
| 3                | 6                | 0              | -3.072518               | -0.000868 | -0.387124 |
| 4                | 6                | 0              | -2.612418               | -1.230278 | 0.190084  |
| 5                | 6                | 0              | -3.654428               | -2.137724 | 0.575579  |

|    |   |   |           |           |           |
|----|---|---|-----------|-----------|-----------|
| 6  | 6 | 0 | -4.965363 | -1.823692 | 0.437203  |
| 7  | 6 | 0 | -1.282726 | -1.641641 | 0.340254  |
| 8  | 6 | 0 | -0.074680 | -0.951244 | 0.108139  |
| 9  | 6 | 0 | 1.100246  | -1.730417 | 0.000325  |
| 10 | 6 | 0 | 2.390761  | -1.230393 | -0.008981 |
| 11 | 6 | 0 | 3.569359  | -1.992693 | -0.170508 |
| 12 | 6 | 0 | 4.870305  | -1.410410 | -0.106078 |
| 13 | 6 | 0 | 6.022565  | -2.012229 | -0.625785 |
| 14 | 6 | 0 | 7.325065  | -1.536446 | -0.313646 |
| 15 | 7 | 0 | 8.416833  | -1.199713 | -0.077709 |
| 16 | 6 | 0 | 6.013303  | -3.112425 | -1.523530 |
| 17 | 7 | 0 | 6.068361  | -3.982212 | -2.298802 |
| 18 | 6 | 0 | 5.021094  | -0.093337 | 0.557844  |
| 19 | 6 | 0 | 4.539799  | 0.102275  | 1.860249  |
| 20 | 6 | 0 | 4.704290  | 1.329333  | 2.493692  |
| 21 | 6 | 0 | 5.334694  | 2.380266  | 1.829508  |
| 22 | 6 | 0 | 5.806650  | 2.198249  | 0.530909  |
| 23 | 6 | 0 | 5.658174  | 0.967436  | -0.099538 |
| 24 | 6 | 0 | 3.411286  | -3.391873 | -0.379627 |
| 25 | 7 | 0 | 3.206334  | -4.534518 | -0.490084 |
| 26 | 1 | 0 | -2.364428 | 0.730069  | -0.746430 |
| 27 | 1 | 0 | -3.387327 | -3.097318 | 1.000600  |
| 28 | 1 | 0 | -1.167349 | -2.685985 | 0.625793  |
| 29 | 1 | 0 | 0.968502  | -2.809866 | -0.045765 |
| 30 | 1 | 0 | 2.526363  | -0.159865 | 0.112163  |
| 31 | 1 | 0 | 4.053969  | -0.718805 | 2.378938  |
| 32 | 1 | 0 | 4.340394  | 1.464301  | 3.507903  |
| 33 | 1 | 0 | 5.457466  | 3.339827  | 2.323314  |
| 34 | 1 | 0 | 6.291362  | 3.016144  | 0.006228  |
| 35 | 1 | 0 | 6.019007  | 0.828771  | -1.114257 |
| 36 | 6 | 0 | -5.033089 | 1.495819  | -1.111733 |
| 37 | 6 | 0 | -5.914530 | 2.159972  | -0.038160 |
| 38 | 6 | 0 | -3.968165 | 2.490790  | -1.577400 |
| 39 | 6 | 0 | -5.903617 | 1.081350  | -2.311628 |
| 40 | 1 | 0 | -6.699049 | 1.483423  | 0.312471  |
| 41 | 1 | 0 | -5.316739 | 2.472894  | 0.824567  |
| 42 | 1 | 0 | -6.395066 | 3.048804  | -0.460073 |
| 43 | 1 | 0 | -3.338316 | 2.070801  | -2.368577 |
| 44 | 1 | 0 | -4.461597 | 3.380178  | -1.981564 |
| 45 | 1 | 0 | -3.322598 | 2.810394  | -0.752573 |
| 46 | 1 | 0 | -6.379560 | 1.969228  | -2.740653 |
| 47 | 1 | 0 | -5.298581 | 0.607754  | -3.091973 |
| 48 | 1 | 0 | -6.690723 | 0.383078  | -2.013512 |
| 49 | 6 | 0 | -0.004125 | 0.515890  | 0.031350  |
| 50 | 6 | 0 | 0.656263  | 1.174973  | -1.019241 |
| 51 | 6 | 0 | -0.578600 | 1.318624  | 1.031268  |
| 52 | 6 | 0 | 0.729484  | 2.555719  | -1.083397 |
| 53 | 1 | 0 | 1.092518  | 0.588840  | -1.823304 |



|    |   |   |           |           |           |
|----|---|---|-----------|-----------|-----------|
| 54 | 6 | 0 | -0.493724 | 2.698116  | 0.997316  |
| 55 | 1 | 0 | -1.084257 | 0.842155  | 1.866780  |
| 56 | 6 | 0 | 0.164092  | 3.362864  | -0.067924 |
| 57 | 1 | 0 | 1.228439  | 3.011963  | -1.930105 |
| 58 | 1 | 0 | -0.927797 | 3.267758  | 1.810524  |
| 59 | 7 | 0 | 0.247793  | 4.725374  | -0.111282 |
| 60 | 6 | 0 | -0.364085 | 5.524935  | 0.929387  |
| 61 | 1 | 0 | 0.077208  | 5.320069  | 1.913698  |
| 62 | 1 | 0 | -0.211198 | 6.580472  | 0.705020  |
| 63 | 1 | 0 | -1.445110 | 5.345559  | 0.995267  |
| 64 | 6 | 0 | 0.946419  | 5.374636  | -1.201096 |
| 65 | 1 | 0 | 1.994650  | 5.054425  | -1.256126 |
| 66 | 1 | 0 | 0.473736  | 5.166404  | -2.170135 |
| 67 | 1 | 0 | 0.931421  | 6.452944  | -1.043317 |
| 68 | 6 | 0 | -6.162431 | -2.661962 | 0.815412  |
| 69 | 6 | 0 | -7.015294 | -1.880816 | 1.831437  |
| 70 | 6 | 0 | -6.992708 | -2.940016 | -0.451015 |
| 71 | 6 | 0 | -5.724948 | -3.990411 | 1.436000  |
| 72 | 1 | 0 | -6.446808 | -1.667989 | 2.742972  |
| 73 | 1 | 0 | -7.367350 | -0.933098 | 1.414517  |
| 74 | 1 | 0 | -7.890596 | -2.477938 | 2.107472  |
| 75 | 1 | 0 | -6.410196 | -3.502634 | -1.188170 |
| 76 | 1 | 0 | -7.873454 | -3.534468 | -0.186636 |
| 77 | 1 | 0 | -7.335611 | -2.012007 | -0.917127 |
| 78 | 1 | 0 | -6.613452 | -4.571888 | 1.700043  |
| 79 | 1 | 0 | -5.130924 | -4.589385 | 0.737756  |
| 80 | 1 | 0 | -5.141653 | -3.839251 | 2.350462  |

-----  
SCF Done: E(RB3P86) = -1732.32226053 A.U.

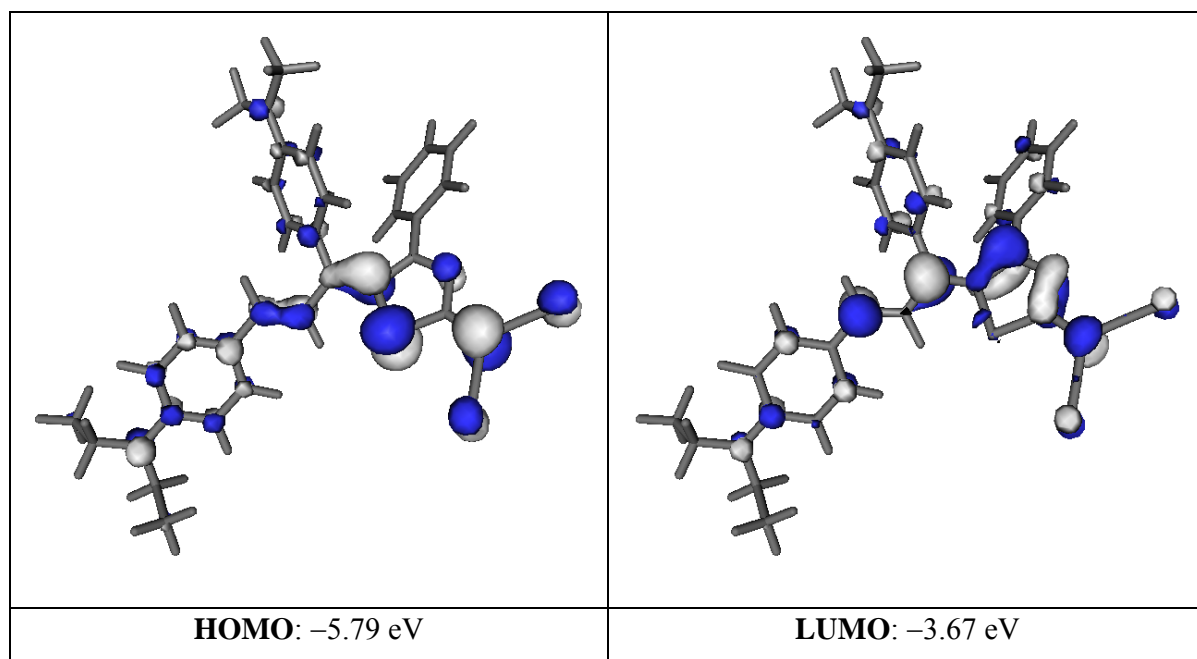

**Figure S53:** HOMO and LUMO contour plots (PCM-B3P86/6-31G\*\*/B3P86-31G\* in CH<sub>2</sub>Cl<sub>2</sub>) for compound **5a**.

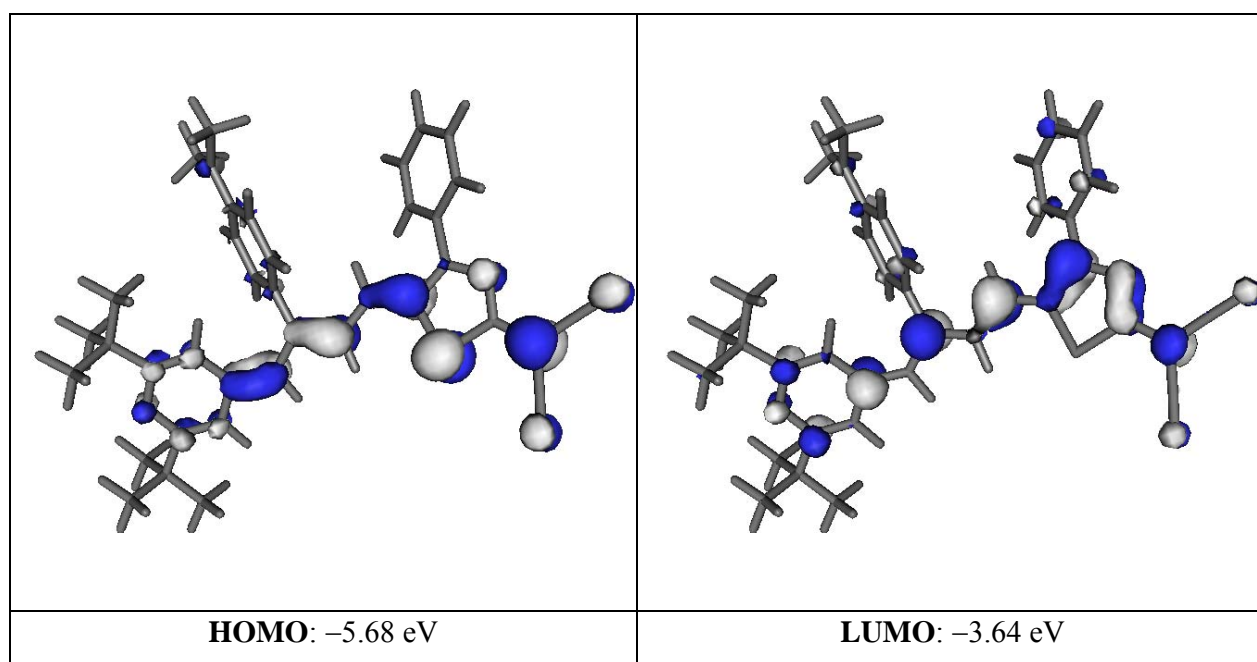

**Figure S54:** HOMO and LUMO contour plots (PCM-B3P86/6-31G\*\*/B3P86-31G\* in CH<sub>2</sub>Cl<sub>2</sub>) for compound **7a**.

## 7. NLO measurements

Electric field induced second harmonic generation (EFISH) measurements have been performed using as the fundamental radiation the 1.9  $\mu\text{m}$  output of a  $\text{H}_2$  Raman shifter pumped by a Q-switched Nd:YAG laser. This laser operates at 1064 nm, with a repetition rate of 10 Hz and pulse width of 8 ns. A computer controlled NLO spectrometer completes the SHG experimental set-up. The 1.9  $\mu\text{m}$  incident light is split in two beams. The less intense one is directed to a *N*-(4-nitrophenyl)-(L)-prolinol (NPP) powder sample whose SH signal is used as a reference in order to reduce the effects of laser fluctuations. The other beam is passed through a linear polarizer and focused into the EFISH wedge shaped liquid cell. Voltage pulses of 5 kV and 3  $\mu\text{s}$  are applied across the cell (2 mm gap between the electrodes) synchronously with the laser pulses. The harmonic signals from both the EFISH cell and the NPP reference are measured with two photomultipliers. Interference filters are used to remove the residual excitation light beyond the sample and the reference.

The molecular  $\mu\beta$  values have been determined in dichloromethane for all compounds. As a rule, three solutions of concentration in the range ( $1 \times 10^{-4}\text{M}$ – $8 \times 10^{-4}\text{M}$ ) were measured. The effect of absorption at harmonic wavelength (953 nm) of compound **6a** has been corrected following ref.<sup>9</sup>.  $\mu\beta_0$  values were extrapolated using a two-level dispersion model.<sup>10</sup> Under the same experimental conditions  $\mu\beta_0$  deduced for DR1 was  $480 \times 10^{-48}$  esu, quite close to the value reported in the same solvent by Dirk et al.<sup>11</sup>

---

(9) Oudar, J. L. *J. Chem. Phys.* **1977**, *67*, 446–457.

(10) Oudar, J. L.; Chemla, D. S. *J. Chem. Phys.* **1977**, *66*, 2664–2668.

(11) Dirk, C. W.; Katz, H. E.; Schilling, M. L.; King, L. A. *Chem. Mater.* **1990**, *2*, 700–705.
